# Supplementary material for: De novo variants in DENND5B cause a neurodevelopmental disorder
Source: Am J Hum Genet. 2024 Feb 21;111(3):529–43. doi: 10.1016/j.ajhg.2024.02.001 (PMC10940048; doi:10.1016/j.ajhg.2024.02.001)
Supplement: Document S2. Article plus supplemental information [file mmc10.pdf]

# De novo variants in *DENND5B* cause a neurodevelopmental disorder

## Graphical abstract

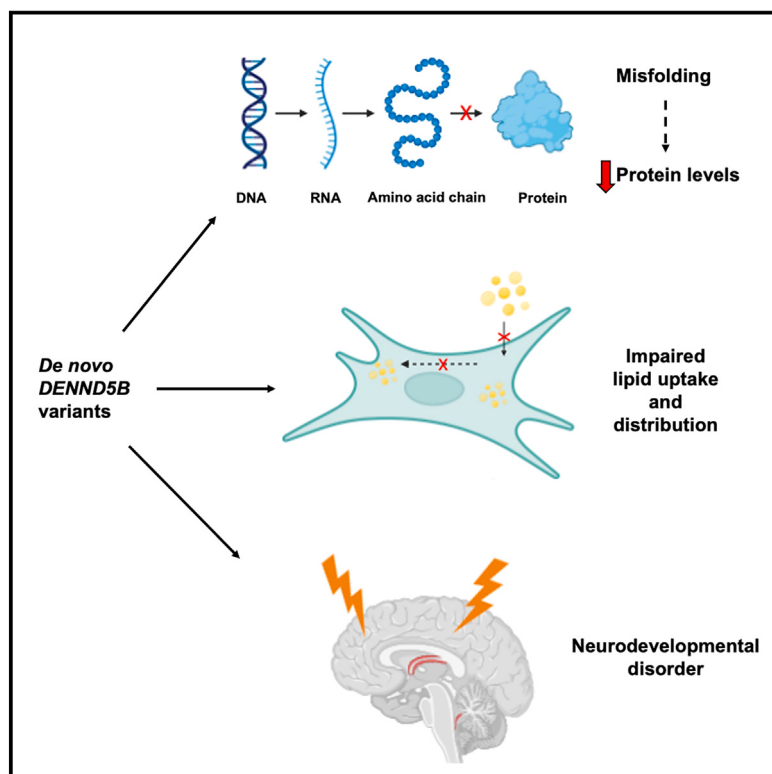

## Authors

Marcello Scala, Valeria Tomati, Matteo Ferla, ..., Vincenzo Salpietro, Nicoletta Pedemonte, Federico Zara

## Correspondence

[v.salpietro@ucl.ac.uk](mailto:v.salpietro@ucl.ac.uk) (V.S.),  
[nicolettapedemonte@gaslini.org](mailto:nicolettapedemonte@gaslini.org) (N.P.)

**In this study, we identify *de novo* missense variants in *DENND5B* as the cause of a neurodevelopmental disorder with dysmorphism and epilepsy. We show that these variants impair intracellular vesicle trafficking, lipid uptake and intracellular distribution, and protein folding, leading to complex neurological manifestations.**

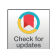

# De novo variants in *DENND5B* cause a neurodevelopmental disorder

Marcello Scala,<sup>1,2,3</sup> Valeria Tomati,<sup>3</sup> Matteo Ferla,<sup>4</sup> Mariateresa Lena,<sup>1</sup> Julie S. Cohen,<sup>5,6</sup> Ali Fatemi,<sup>5,6</sup> Elly Brokamp,<sup>7</sup> Anna Bican,<sup>7</sup> John A. Phillips III,<sup>7</sup> Mary E. Koziura,<sup>7</sup> Michael Nicouveau,<sup>8</sup> Marlene Rio,<sup>8,9</sup> Karine Siquier,<sup>8</sup> Nathalie Boddaert,<sup>10</sup> Ilaria Musante,<sup>3</sup> Serena Tamburro,<sup>3</sup> Simona Baldassari,<sup>3</sup> Michele Iacomino,<sup>3</sup> Paolo Scudieri,<sup>3</sup> Undiagnosed Diseases Network, Jill A. Rosenfeld,<sup>11,12</sup> Gary Bellus,<sup>13</sup> Sara Reed,<sup>13</sup> Hind Al Saif,<sup>14</sup> Rossana Sanchez Russo,<sup>15</sup> Matthew B. Walsh,<sup>15</sup> Vincent Cantagrel,<sup>8</sup> Amy Crunk,<sup>16</sup> Stefano Gustincich,<sup>17</sup> Sarah M. Ruggiero,<sup>18,19</sup> Mark P. Fitzgerald,<sup>18,19,20</sup> Ingo Helbig,<sup>18,19,20,21</sup> Pasquale Striano,<sup>1,2</sup> Mariasavina Severino,<sup>22</sup> Vincenzo Salpietro,<sup>1,2,\*</sup> Nicoletta Pedemonte,<sup>3,\*</sup> and Federico Zara<sup>1,3</sup>

## Summary

The Rab family of guanosine triphosphatases (GTPases) includes key regulators of intracellular transport and membrane trafficking targeting specific steps in exocytic, endocytic, and recycling pathways. *DENND5B* (Rab6-interacting Protein 1B-like protein, R6IP1B) is the longest isoform of *DENND5*, an evolutionarily conserved DENN domain-containing guanine nucleotide exchange factor (GEF) that is highly expressed in the brain. Through exome sequencing and international matchmaking platforms, we identified five *de novo* variants in *DENND5B* in a cohort of five unrelated individuals with neurodevelopmental phenotypes featuring cognitive impairment, dysmorphism, abnormal behavior, variable epilepsy, white matter abnormalities, and cortical gyration defects. We used biochemical assays and confocal microscopy to assess the impact of *DENND5B* variants on protein accumulation and distribution. Then, exploiting fluorescent lipid cargoes coupled to high-content imaging and analysis in living cells, we investigated whether *DENND5B* variants affected the dynamics of vesicle-mediated intracellular transport of specific cargoes. We further generated an *in silico* model to investigate the consequences of *DENND5B* variants on the *DENND5B*-RAB39A interaction. Biochemical analysis showed decreased protein levels of *DENND5B* mutants in various cell types. Functional investigation of *DENND5B* variants revealed defective intracellular vesicle trafficking, with significant impairment of lipid uptake and distribution. Although none of the variants affected the *DENND5B*-RAB39A interface, all were predicted to disrupt protein folding. Overall, our findings indicate that *DENND5B* variants perturb intracellular membrane trafficking pathways and cause a complex neurodevelopmental syndrome with variable epilepsy and white matter involvement.

## Introduction

The differentially expressed in normal and neoplastic (DENN) cells domain is a poorly characterized though extremely conserved module present in proteins of diverse species.<sup>1</sup> In the human genome, eighteen genes encode DENN domain-containing proteins that function as generalized guanine nucleotide exchange factors (GEFs) for Rab family proteins.<sup>2</sup> These are small guanosine triphosphatases (GTPases) regulating membrane trafficking through the orchestration of biogenesis, transport, and fusion of intracellular organelles and vesicles.<sup>3,4</sup> Acting as molecular

switches, Rab proteins cycle between an active GTP-loaded state and an inactive GDP-loaded state, with ancillary GEFs and GTPase-activating proteins (GAPs) catalyzing this cycle.<sup>3,4</sup> As orchestrators of intracellular vesicle movement, Rab proteins are essential regulators of neuronal polarity and modulators of synaptic architecture and function.<sup>5</sup> The functional deficiency of Rab proteins is associated with heterogeneous human diseases, including neurodevelopmental disorders (NDDs) and neurodegenerative conditions.<sup>6</sup>

*DENND5B* (MIM: 617279) is located on chromosome 12 (12p11.21) and encodes a 1,274-amino-acid protein with a

<sup>1</sup>Department of Neurosciences, Rehabilitation, Ophthalmology, Genetics, Maternal and Child Health, University of Genoa, Genoa, Italy; <sup>2</sup>Pediatric Neurology and Muscular Diseases Unit, IRCCS Istituto Giannina Gaslini, Genoa, Italy; <sup>3</sup>UOC Genetica Medica, IRCCS Istituto Giannina Gaslini, Genoa, Italy; <sup>4</sup>Oxford Protein Informatics Group, Department of Statistics, University of Oxford, Oxford, UK; <sup>5</sup>Department of Neurology and Developmental Medicine, Kennedy Krieger Institute, Baltimore, MD, USA; <sup>6</sup>Department of Neurology, Johns Hopkins University School of Medicine, Baltimore, MD, USA; <sup>7</sup>Department of Pediatrics, Vanderbilt University Medical Center, Nashville, TN, USA; <sup>8</sup>Université Paris Cité, Imagine Institute, Developmental Brain Disorders Laboratory, INSERM UMR 1163, 75015 Paris, France; <sup>9</sup>Service de Génétique, Necker Enfants Malades University Hospital, Assistance Publique-Hôpitaux de Paris, Paris, France; <sup>10</sup>Département de Radiologie Pédiatrique, INSERM UMR 1163 and INSERM U1000, AP-HP, Hôpital Necker-Enfants Malades, Paris, France; <sup>11</sup>Department of Molecular & Human Genetics, Baylor College of Medicine, Houston, TX, USA; <sup>12</sup>Baylor Genetics Laboratories, Houston, TX, USA; <sup>13</sup>Clinical Genetics, Geisinger Medical Center, Danville, PA 17822, USA; <sup>14</sup>Department of Human and Molecular Genetics, Division of Clinical Genetics, Virginia Commonwealth University School of Medicine, Richmond, VA, USA; <sup>15</sup>Department of Human Genetics, Emory University, Atlanta, GA 30322, USA; <sup>16</sup>GenEdx, Gaithersburg, MD 20877, USA; <sup>17</sup>Department of Neuroscience and Brain Technologies, Istituto Italiano di Tecnologia, 16163 Genoa, Italy; <sup>18</sup>Division of Neurology, Children's Hospital of Philadelphia, Philadelphia, PA 19104, USA; <sup>19</sup>The Epilepsy NeuroGenetics Initiative (ENGIN), Children's Hospital of Philadelphia, Philadelphia, PA, USA; <sup>20</sup>Department of Neurology, University of Pennsylvania, Perelman School of Medicine, Philadelphia, PA 19104, USA; <sup>21</sup>Department of Biomedical and Health Informatics (DBHI), Children's Hospital of Philadelphia, Philadelphia, PA 19104, USA; <sup>22</sup>Neuroradiology Unit, IRCCS Istituto Giannina Gaslini, Genoa, Italy

\*Correspondence: [v.salpietro@ucl.ac.uk](mailto:v.salpietro@ucl.ac.uk) (V.S.), [nicolettapedemonte@gaslini.org](mailto:nicolettapedemonte@gaslini.org) (N.P.)  
<https://doi.org/10.1016/j.ajhg.2024.02.001>

© 2024 The Authors. This is an open access article under the CC BY license (<http://creativecommons.org/licenses/by/4.0/>).

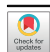

molecular weight of 145 kDa.<sup>7,8</sup> DENND5B, also known as Rab6-interacting Protein 1B-like protein (R6IP1B or R6IP1-like), is one of the two members of the DENND5 protein subfamily, the other being DENND5A (also known as R6IP1A or R6IP1).<sup>7,8</sup> These related DENN proteins interact with functionally relevant Rab proteins, such as RAB6, RAB11, and RAB39. As such, DENND5 proteins have been suggested to contribute to synaptic plasticity through the modulation of synaptic vesicle axonal trafficking and neurotransmitter release.<sup>7,8</sup> DENND5A and DENND5B contain six distinct functional domains. The DENN domain is encircled on both sides by more divergent domains, known as uDENN (upstream DENN) and dDENN (downstream DENN), forming the tripartite DENN domain. This evolutionarily conserved module mainly exerts the GEF activity toward Rab proteins, with the uDENN module also responsible for the interaction between DENND5A and RAB11.<sup>1,2,8</sup> The first of the two RUN (RPIP8 [RaP2-interacting protein 8], UNC-14, and NESCA [new molecule containing SH3 at the carboxyl terminus]) domains, RUN1, mediates the nucleotide-dependent binding to Rab6, that is a crucial step for Rab6-dependent targeting of DENND5B to the Golgi.<sup>1,8</sup> Based on the similarities with DENND5A, the RUN2 domain of DENND5B is predicted to interact with Sorting Nexin 1.<sup>9</sup> SNX1 is a conserved membrane-associated protein that regulates the retrograde transport of a large number of cargoes from endosome to trans-Golgi network (TGN).<sup>10</sup> Thus, it is possible that DENND5B contributes to regulate cargo trafficking in the endosome-to-TGN pathway.<sup>9</sup> RUN1-2 domains are separated by a PLAT (polycystin-1, lipoxigenase, alpha-toxin) domain, whose lipophilic loops interacts with lipids within the membranes of recycling endosomes and may contribute to the tethering of these membranes with Golgi membranes together with RAB11.<sup>11</sup>

Recent evidence suggests that DENND5B may be implicated in the regulation of lipid metabolism. Studies focusing on the *Dennd5b*<sup>-/-</sup> mouse revealed that DENND5B plays a crucial role in post-Golgi chylomicron secretion, contributing to modulate intestinal triglyceride absorption, body composition, and peripheral lipoprotein metabolism.<sup>12</sup> Additionally, DENND5B deficiency leads to differential expression of key genes involved in hepatic lipid metabolism and lipid storage, resistance to diet-induced obesity, overall increase in plasma lipids, and reduced aortic atherosclerosis.<sup>13</sup> In human subjects, the presence of the polymorphic variant (GenBank: NM\_144973.4): c.155G>A (p.Arg52Lys) (rs4930979, AF = 0.441) in homozygous status has been associated with low body mass index (BMI) and reduced abdominal circumference.<sup>12,14,15</sup> Another polymorphism, GenBank: NM\_144973.4 (c.1459C>A [p.His487Asn]) (AF = 0.137), was instead correlated with low-density lipoprotein cholesterol (LDL-C) plasmatic profile but not to BMI.<sup>12,13</sup>

Aside from this influence on lipid metabolism, DENND5 is suggested to play a relevant role in brain development and function. *Dennd5a* knockdown in mouse hippocampal neurons resulted in dendrite outgrowth and improper synaptic

connectivity.<sup>16</sup> Humans harboring bi-allelic loss-of-function variants in *DENND5A* (MIM: 617278) show a severe epileptic encephalopathy with brain calcifications (developmental and epileptic encephalopathy 49 [MIM: 617281]).<sup>16</sup> In mice, *Dennd5b* expression is mainly restricted to neurons and is especially enriched in the hippocampus.<sup>7</sup> In the human brain, *DENND5B* is preferentially expressed in the cerebral cortex, basal ganglia, cerebellum, and hippocampus (<https://www.proteinatlas.org/ENSG00000170456-DENND5B/tissue>). Additionally, the expression of *DENND5B* was recently reported to be significantly decreased in the brains of individuals with temporal lobe epilepsy and chronic epileptic mouse models.<sup>7</sup> Overall, these findings suggest that DENND5B function may correlate with epileptogenesis and, possibly, neurodevelopment in humans.<sup>7</sup>

In this study, we investigated a cohort of five unrelated individuals presenting with neurodevelopmental phenotypes featuring abnormal behavior, seizures, and distinct brain MRI abnormalities. In these subjects, we identified five *de novo* missense variants in *DENND5B*. Using different biochemical and functional approaches, we investigated the impact of selected *DENND5B* variants on protein accumulation, endosomal system activity, and intracellular membrane trafficking pathways. Our findings highlight the role of *DENND5B* variants as the cause of a neurodevelopmental syndrome with early-onset seizures and white matter abnormalities.

## Subjects and methods

### Ethics statement

The study involving human participants was conducted according to the guidelines of the Declaration of Helsinki and was approved by the medical ethical committee installed by Gaslini Children's Hospital (Comitato Etico della Regione Liguria, approval code 163/2018). Informed consent was obtained from the parents or legal guardians of all the enrolled participants.

### Subject enrollment and ascertainment

Affected individuals were recruited through international collaboration involving several clinical and research centers in Italy, the Netherlands, and the USA (further details available in the [supplemental information](#)), also using match maker platforms such as GeneMatcher.<sup>17</sup> Enrolled subjects were thoroughly evaluated by pediatric neurologists, neuropsychiatrists, and neurogeneticists. The degree of intellectual disability was evaluated through Wechsler Intelligence Scale for Children (WISC V) in subjects #1 and #2, and thorough neuropsychiatric evaluation was performed to assess the degree of neurodevelopmental impairment in the remaining individuals. Brain MRI scans, locally performed for care purposes, were reviewed by an expert pediatric neuroradiologist (M. Severino).

### Genetic analysis

For exome sequencing (ES), genomic DNA was extracted from peripheral blood lymphocytes or buccal swab samples of the probands and parents (when available). Trio-ES was performed in all subjects as previously described ([supplemental information](#)).

Variants were filtered according to minor allele frequency  $\leq 0.001$  in Genome Aggregation Database (gnomAD v.4.0.0, <https://gnomad.broadinstitute.org>), conservation of affected residues (Genomic Evolutionary Rate Profiling [GERP], <http://mendel.stanford.edu/SidowLab/downloads/gerp/>), and predicted functional impact through different *in silico* tools. Candidate variants were classified according to the American College of Medical Genetics and Genomics and the Association for Molecular Pathology (ACMG-AMP) guidelines, based on their predicted pathogenicity.<sup>18</sup> *DENND5B* variants are reported according to GenBank: NM\_144973.4 transcript, corresponding to the isoform 1 of DENND5B protein (GenBank: NP\_659410.3). Further details are available in the [supplemental information](#). The presence of copy number variations (CNVs) was investigated in all subjects through array comparative genomic hybridization (aCGH) or ES-based CNV calling ([supplemental information](#)).

### Cell culture

HeLa cells were grown in DMEM (Euroclone) cell culture medium, while CFPAC-1 cells were grown in DMEM-F12 (Euroclone). Cell culture media were supplemented with 10% FBS (ECS5000L Euroclone), 2 mM L-glutamine, 100 U/mL penicillin, and 100  $\mu$ g/mL streptomycin (Euroclone). Primary fibroblasts were grown in RPMI medium (Euroclone) supplemented with 20% FBS (ECS5000L Euroclone), 2 mM L-glutamine, 100 U/mL penicillin, and 100  $\mu$ g/mL streptomycin (Euroclone). For sphingolipid transport functional analysis, for autophagic vacuoles detection, and for DENND5B immunolocalization studies,  $30 \times 10^5$  per well primary fibroblasts derived from affected individuals' dermal biopsies, HeLa, or CFPAC-1 cells were plated in 96-wells plates (Corning). For CFPAC-1 cells, plates were coated with poly-D-lysine (Merck KGaA) to increase cellular adherence to the bottom of the wells. Cells were imaged 24 h after plating.

### Vectors

We have designed a custom reporter backbone containing a CMV promoter, *DENND5B* (encoding either wild-type or the variant forms p.Ser800Leu, p.Asp849Glu, p.His852Tyr) followed by an engineered Tag Blue Fluorescent Protein 2 (TagBFP2) BFP2 (an improved variant of TagBFP generated by I174A mutation) fused with the neomycin resistance gene *Neo* (TagBFP2/*Neo*) as expression marker.<sup>19</sup> The generation of the plasmid was outsourced to VectorBuilder (vector IDs available upon request).

### Transient transfection

For sphingolipid transport functional analysis and for DENND5B immunolocalization studies, HeLa and CFPAC-1 cells were reverse-transfected onto 96-well plates (Corning) with 0.2  $\mu$ g per well of the indicated vectors (see [subjects and methods](#), [vectors](#) section). To measure DENND5B accumulation by western blot, HeLa and CFPAC-1 cells were reverse-transfected onto 6-well plates with 2  $\mu$ g per well of the indicated vectors (see [subjects and methods](#), [vectors](#) section). Lipofectamine 2000 (ThermoFisher Scientific) was used as a transfection reagent. Cells were transfected in Opti-MEM Reduced Serum Medium (ThermoFisher Scientific). After 6 h, Opti-MEM was carefully replaced with culture medium without antibiotics.

### Western blot

To measure DENND5B accumulation by western blot, primary fibroblast derived from affected individuals' dermal biopsies (#2 and #3)

were grown to confluence onto a 60 mm Petri dish, while HeLa and CFPAC-1 cells were grown to confluence onto a 6-well plate. The day of cell lysis, cells were washed with ice-cold D-PBS without  $\text{Ca}^{2+}/\text{Mg}^{2+}$  and then lysed in RIPA buffer 50 mM (50 mM Tris-HCl [pH 7.4], 150 mM NaCl, 1% Triton X-100, 0.5% sodium deoxycholate, 0.1% SDS) containing a complete protease inhibitor cocktail (Roche). Lysates were then separated by centrifugation at  $15,000 \times g$  at 4°C for 10 min. The supernatant protein concentration was calculated using a BCA assay (ThermoFisher Scientific) following the manufacturer's protocol. 30  $\mu$ g of total cell lysates were separated onto gradient 4%–15% Criterion TGX Precast gels (Bio-rad Laboratories), transferred to a nitrocellulose membrane with a Trans-Blot Turbo system (Bio-rad Laboratories), and analyzed by western blotting. DENND5B and GAPDH were detected using the following antibodies: rabbit polyclonal anti-DENND5B (PA5-58569, Invitrogen, ThermoFisher Scientific), rabbit polyclonal anti-DENND5B (HPA038865, Merck KGaA), and mouse monoclonal anti-GAPDH (sc-32233; Santa Cruz Biotechnology; RRID: AB\_627679). Membranes were subsequently incubated with secondary antibodies horseradish peroxidase (HRP)-conjugated anti-rabbit IgG (31460; ThermoFisher Scientific; RRID: AB\_228341) or HRP-conjugated anti-mouse IgG (ab97023; Abcam; RRID: AB\_10679675). Proteins were visualized by chemiluminescence using the SuperSignalWest Femto Substrate (ThermoFisher Scientific). Molecular Imager ChemiDoc XRS System (Bio-rad Laboratories) was used to monitor the chemiluminescence. Images were analyzed with ImageJ software (National Institutes of Health). Bands were analyzed as region of interest (ROI), normalized against the GAPDH loading control.

### Sphingolipid transport functional analysis

HeLa cells, transiently expressing the WT or *DENND5B* mutants, or fibroblasts derived from subjects with different genotypes, plated on clear-bottom 96-well black microplates suitable for high-content imaging, were exposed, at the beginning of the experiments, to fluorescent lipid probes (NBD C6-ceramide [catalog #N1154] or BODIPY FL C12-sphingomyelin [catalog #D7711], ThermoFisher Scientific) that were added to the medium. The uptake and intracellular distribution of the fluorescent probes was then monitored by high-content imaging and analysis using an Opera Phenix (PerkinElmer) high-content screening system. Wells were imaged in confocal mode, using a 40 $\times$  water-immersion objective. NBD or BODIPY fluorescent signals were laser-excited at 480 nm and the emission wavelengths were collected between 500 and 550 nm. Fluorescent spots resembling intracellular vesicles containing fluorescent lipids were quantified using the Harmony software (v.4.9) of the Opera Phenix high-content system. For each DENND5B form, transiently transfected in HeLa cells, five independent replicates were analyzed. Each independent biological replicate consisted of a region measuring  $1,320 \times 1,320 \mu\text{m}$ , comprising approximately 35–40 TagBFP2-positive cells. For each patient-derived fibroblast population, nine independent replicates were analyzed. Each independent biological replicate consisted of a region measuring  $990 \times 1,320 \mu\text{m}$ , comprising approximately one hundred fibroblasts. Statistical significance was tested by parametric ANOVA followed by the Dunnett multiple comparisons test (all groups against the control group).

### Autophagic vacuoles detection

HeLa cells, transiently transfected with plasmids encoding WT or DENND5B mutants and plated on clear-bottom 96-well black

microplates suitable for high-content imaging, were incubated with 50  $\mu$ M MDC (Sigma-Aldrich) in PBS at 37°C for 10 min. After incubation, cells were washed three times with PBS and immediately imaged, in confocal mode and with a 40 $\times$  water-immersion objective, using an Opera Phenix (PerkinElmer) high-content screening system. MDC signal was laser-excited at 405 nm and the emission wavelengths were collected between 435 and 550 nm. Data analysis of MDC spot number was performed using the Harmony software (v.4.9) of the Opera Phenix high-content system. For each *DENND5B* form, transiently transfected in HeLa cells, five independent replicates were analyzed. Each independent biological replicate consisted of a region measuring 1,320  $\times$  1,320  $\mu$ m, comprising approximately 35–40 TagBFP2-positive cells. Statistical significance was tested by parametric ANOVA followed by the Dunnett multiple comparisons test (all groups against the control group).

### Statistical analysis

Statistical significance was assessed by performing the analysis of variance (ANOVA) followed by a post hoc test, to avoid “multiple comparison errors” when comparing more than two groups. The assumption of normality was assessed using the Kolmogorov-Smirnov test. In case of normally distributed quantitative variables, a parametric ANOVA was performed. Data derived from biochemical and functional analyses on heterologous expression systems or fibroblasts derived from affected individuals, normally distributed, are expressed as mean  $\pm$  SEM. Statistical significance was tested by parametric one-way analysis of variance (ANOVA) followed by the Dunnett multiple comparisons test (all groups against the control group) as a post hoc test. Significances are two-sided. Differences were considered statistically significant when  $p < 0.05$ .

### In silico analysis

A model of *DENND5B* (Uniprot Q6ZUT9) in complex with RAB39A (Q14964) was generated with ColabFold (<https://github.com/sokrypton/ColabFold>) with AlphaFold multimer v.3 weights, 48 recycles and a default MMSeqs2 generated MSA, run on one Nvidia A100 slot and 18 CPUs in the UKRI Science and Technology Facilities Council (STFC) Iris cluster. Difference in Gibbs free energy was calculated with PyRosetta and the FastRelax mover (15 cycles, 15 Å neighborhood sphere) following a previous approach.<sup>20</sup> Interactive model generated with Michelangelo.<sup>21</sup> Data are available at <https://github.com/matteoferla/Q6ZUT9-analyses>.

## Results

### Identification and in silico analysis of *DENND5B* variants

ES led to the identification of five distinct heterozygous *DENND5B* variants in the reported individuals: c.2554C>T (p.His852Tyr) in #1; c.2399C>T (p.Ser800Leu) in #2; c.2547C>A (p.Asp849Glu) in #3; c.1676C>T (p.Ser559Leu) in #4; and c.2246G>A (p.Arg749His) in #5. The variants occurred *de novo* in all subjects (Figure 1A). All *DENND5B* variants are rare missense changes (absent in the gnomAD database, v.4.0.0) affecting conserved residues (GERP score 4.05 to 4.99) within or in close proximity to the tripartite DENN domain and, especially, the RUN1 domain (Figure 1B). Four out of five variants are absent in gnomAD (v.4.0.0), whereas the p.Ser800Leu has a very low allele frequency

(0.000006574), being reported in a single heterozygous individual. All *DENND5B* variants are predicted to be variably damaging according to several different *in silico* tools (Table S1). No additional potentially deleterious variants in known disease-associated genes were identified in the reported subjects (Table S2). Through gene matching, we also identified two additional potentially deleterious heterozygous variants in *DENND5B* in two subjects showing neurodevelopmental phenotypes, although in the absence of definite segregation information (further details available in the supplemental information, Tables S3 and S4).

### Individuals with *DENND5B* variants display heterogeneous neurodevelopmental phenotypes

Affected individuals harboring *DENND5B* variants showed a clinically heterogeneous neurological involvement, with mild to severe neurodevelopmental phenotypes (Table 1; Figure 2A). All subjects presented with psychomotor delay, leading to variable degrees of intellectual disability (Table 1). Subject #1 showed selective motor delay in the context of spastic/dystonic cerebral palsy, whereas all other subjects were diagnosed with global impairment of psychomotor development. The severity of the developmental delay/intellectual disability phenotype was mild in three subjects (#1, #2, and #5), moderate in one (#4), and severe in one (#3). Of note, no intellectual disability was diagnosed in #2. Overall, this suggests that there is a mixed spectrum of neurodevelopmental disabilities associated with *DENND5B* variants, ranging from mild to severe phenotypes.

Behavioral disorders were present in three subjects. These included attention-deficit hyperactivity disorder (ADHD) in #1, autism spectrum disorder (ASD) in #2 and #5, and a combination of anxiety, compulsiveness, and behavioral dysregulation in #5 (Table S5). Hand stereotypes were observed in two subjects (#2 and #5) and sleep disorders in two individuals (#1 and #5). Four subjects showed hypotonia, either truncal (#1) or generalized (#3–#5). Additional neurological manifestations were heterogeneous and included dysarthria (#3), dystonia (#1), and spasticity (#1). Macrocephaly was present in subjects #1 (2.6 SDS) and #2 (3.19 SDS), whereas microcephaly was observed in individual #3 (–2.48 SDS).

Seizures were reported in three subjects (#1, #3, and #5) (Table S5). While a single episode of febrile seizures occurred in subject #1, recurrent epileptic manifestations were observed in #3 and #5. Subject #3 experienced monthly multifocal seizures and partial seizures with secondary generalization since the age of 1 year. The electroencephalogram (EEG) at onset showed signs of a left anterior temporal partial epilepsy in the context of a slowing of the background activity. Follow-up EEG further showed an involvement of the right frontal region, with features suggestive of a focal cerebral dysfunction. This subject became seizure-free with a combination antiepileptic drug (AED) therapy featuring oxcarbazepine, levetiracetam, zonisamide, clobazam, and lamotrigine. Subject #5 presented with recurrent focal seizures in the first year of life,

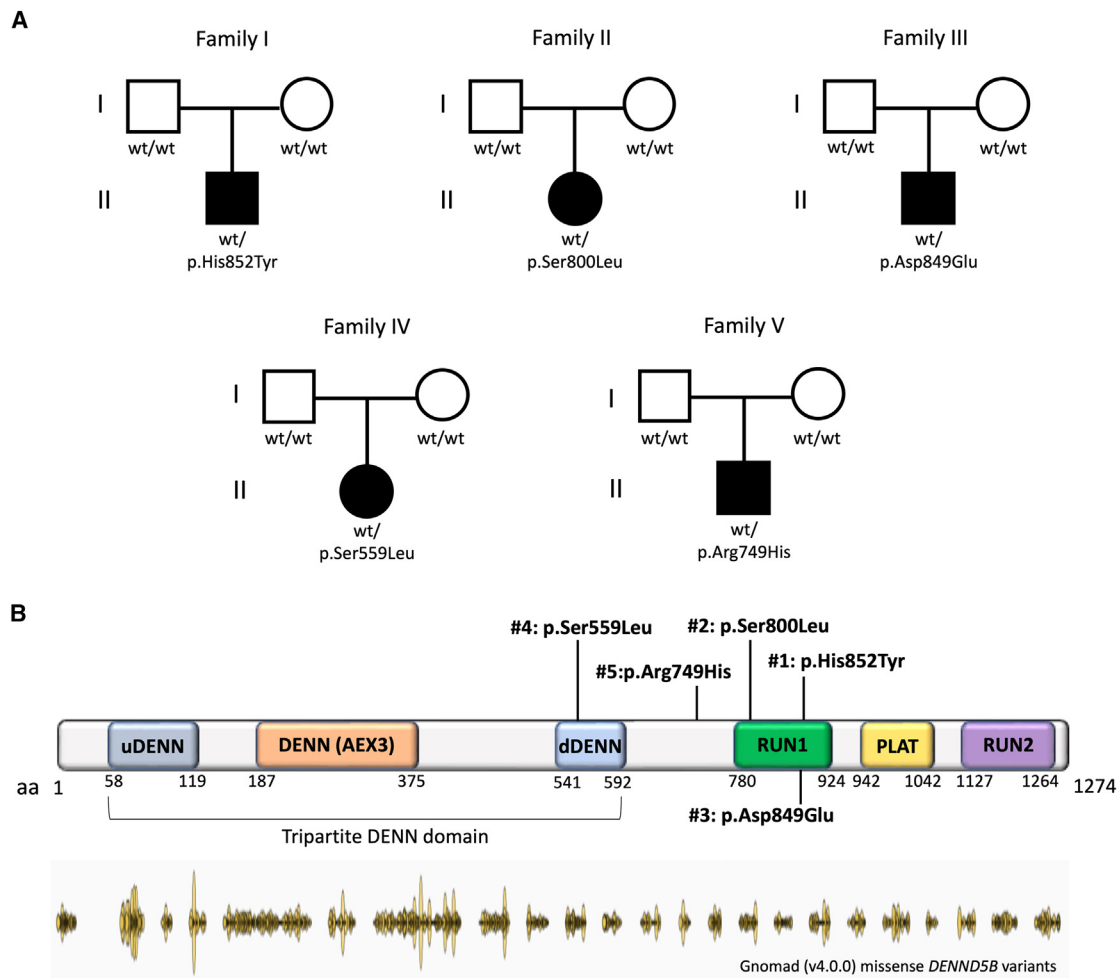

**Figure 1. Summary of *DENND5B* variants and family pedigrees**

(A) Schematic representation of *DENND5B* (GenBank: NP\_659410.3) showing the localization of the variants detected in the reported cohort. Most variants lie within or in close proximity to the tripartite DENN domain or the RUN1 domain.

(B) Pedigrees of the reported families showing the segregation of *DENND5B* variants (GenBank: NM\_144973.4). Abbreviations: DENN, differentially expressed in neoplastic vs. normal cells; NA, not available; PLAT, polycystin-1, lipoxigenase, alpha-toxin; RUN, RPIP8 (RaP2-interacting protein 8), UNC-14, and NESCA.

associated with episodes of behavioral arrest and impaired consciousness. These manifestations typically lasted a few seconds and were characterized by staring and backwards rolling of the eyes.

The EEG showed a diffuse slowing of the background activity, abundant multifocal epileptiform discharges, and brief runs of spike and wave discharges that were particularly evident in the left posterior temporal and right temporal regions. Partial control on seizure severity was achieved with an AED treatment consisting of levetiracetam and valproate, but seizures persisted with weekly episodes.

Brain MRI abnormalities were present in four out of five individuals with an available MRI scan for review (#1, #2, #3, and #5). White matter involvement was noted in three subjects, including volume loss with consequent ventricular enlargement and signal alterations (Figure 2B). Thinning of the corpus callosum was detected in two subjects (#1 and #5). Cortical gyration abnormalities were noted in two subjects, including right frontal focal dysgyria in individual #1

and foliar anomaly in the superior cerebellar vermis in individual #2. Additional findings included hypoplasia of the optic chiasm and bilateral mesial temporal sclerosis in subject #3.

Facial dysmorphism was observed in two subjects (Figure 2A). Individual #1 showed arched and sparse eyebrows, narrow palpebral fissures, hypertelorism, bulbous nose tip, deep philtrum, thick lower lip, and prominent chin. Short nose, hypertelorism, malposition of teeth, deep nasal bridge, deep philtrum, and micrognathia were observed in individual #3. Overall, the overlap was limited to hypertelorism and deep philtrum, thus not supporting an overarching dysmorphism in these individuals. Additional extra-neurological clinical manifestations were also observed in some subjects, involving the visual, cardiac, skeletal, and gastrointestinal systems (Table S5). Although *DENND5B* has been implicated in the regulation of lipid metabolism and body composition,<sup>12</sup> no abnormalities in the lipid profile or body fat distribution were detected in our cohort.

**Table 1. Summary of genetic, clinical, and neuroimaging features in subjects harboring *DENND5B* variants**

| Subject ID                           | #1                      | #2                      | #3                      | #4                      | #5                      | Total       |
|--------------------------------------|-------------------------|-------------------------|-------------------------|-------------------------|-------------------------|-------------|
| Age, sex                             | 15 years, M             | 12 years, F             | 17 years, M             | 2 years, F              | 15 years, M             |             |
| Country of origin                    | USA                     | France                  | USA                     | USA                     | USA                     |             |
| <i>DENND5B</i> variant (NM_144973.4) | c.2554C>T (p.His852Tyr) | c.2399C>T (p.Ser800Leu) | c.2547C>A (p.Asp849Glu) | c.1676C>T (p.Ser559Leu) | c.2246G>A (p.Arg749His) |             |
| Psychomotor delay                    | +                       | +                       | +                       | +                       | +                       | 5/5 (100%)  |
| Motor delay                          | +                       | +                       | +                       | +                       | +                       | 5/5 (100%)  |
| Speech delay                         | –                       | +                       | +                       | +                       | +                       | 4/5 (80%)   |
| Intellectual disability              | +                       | –                       | +                       | N/A <sup>a</sup>        | +                       | 3/5 (60%)   |
| DD/intellectual disability severity  | mild                    | mild                    | severe                  | moderate <sup>a</sup>   | mild                    |             |
| Facial dysmorphism                   | +                       | –                       | +                       | –                       | –                       |             |
| Abnormal OFC                         | + (macrocephaly)        | + (macrocephaly)        | + (microcephaly)        | N/A                     | –                       | 3/5 (60%)   |
| Abnormal behavior                    | +                       | +                       | N/A                     | –                       | +                       | 3/4 (75%)   |
| ASD                                  | –                       | +                       | N/A                     | –                       | +                       | 2/4 (50%)   |
| ADHD                                 | +                       | –                       | N/A                     | –                       | –                       | 1/3 (33.3%) |
| Stereotyped movements                | –                       | +                       | N/A                     | –                       | +                       | 2/4 (50%)   |
| Neurological features                |                         |                         |                         |                         |                         |             |
| Hypotonia                            | +                       | –                       | +                       | +                       | +                       | 4/5 (80%)   |
| Spasticity                           | + (spastic diplegia)    | –                       | N/A                     | –                       | –                       | 1/4 (25%)   |
| Dysarthria                           | –                       | –                       | +                       | –                       | –                       | 1/5 (20%)   |
| Sleep disorders                      | +                       | –                       | N/A                     | –                       | +                       | 2/4 (50%)   |
| Epilepsy                             | –                       | –                       | +                       | –                       | +                       | 2/5 (40%)   |
| Seizure onset                        | 4 years                 | –                       | 1 year                  | –                       | 1 year                  |             |
| Seizure type                         | febrile, one episode    | –                       | focal                   | –                       | multifocal              |             |
| EEG                                  | NA                      | –                       | FD, SBA                 | –                       | MFD, SBA                |             |
| Response to AEDs                     | NA                      | –                       | seizure freedom         | –                       | ↓ severity              |             |
| Brain MRI                            |                         |                         |                         |                         |                         |             |
| WM involvement                       | +                       | –                       | +                       | N/A                     | +                       | 3/4 (75%)   |
| Subcortical abnormalities            | +                       | –                       | +                       | N/A                     | –                       | 2/4 (50%)   |
| CCH                                  | +                       | –                       | –                       | N/A                     | +                       | 2/4 (50%)   |
| Optic chiasm hypoplasia              | –                       | –                       | +                       | N/A                     | –                       | 1/4 (25%)   |
| Ventricular enlargement              | +                       | –                       | –                       | N/A                     | –                       | 1/4 (25%)   |
| Gyration defects                     | +                       | +                       | –                       | N/A                     | –                       | 2/4 (50%)   |
| Other                                | +                       | –                       | +                       | N/A                     | –                       | 2/4 (50%)   |

ADHD, attention deficit-hyperactivity disorder; AEDs, antiepileptic drugs; ASD, autism spectrum disorder; CCH, corpus callosum hypoplasia; DD, developmental delay; F, female; FD, focal discharges; FTT, failure to thrive; ID, intellectual disability; M, male; MFD, multifocal discharges; MFS, multifocal seizures; N/A, not available; OFC, occipito-frontal circumference; SBD, slowing of background activity; WM, white matter; y, years.

<sup>a</sup>This subject is under five years of age. The degree of intellectual disability is hardly assessable but, based on thorough neuropsychiatric evaluation, the severity of the DD/intellectual disability phenotype was considered as moderate.

### ***DENND5B* variants cause decreased protein levels in heterologous expression systems**

We investigated the impact of the detected variants on *DENND5B* physiological function. To this aim, we selected three variants, p.His852Tyr (in #1), p.Ser800Leu (in #2), and p.Asp849Glu (in #3), affecting the RUN1 domain, where most *DENND5B* variants were localized. These mutants were

expressed in different cell models by means of vectors encoding the *DENND5B* protein (either wild-type or the variant forms) and, as expression marker, an engineered TagBFP2 fused with the neomycin resistance gene *Neo* (TagBFP2/*Neo*) that allowed us to easily monitor transfection efficiency. We expressed WT and *DENND5B* mutants into two cell lines having different cell background: HeLa (derived from a

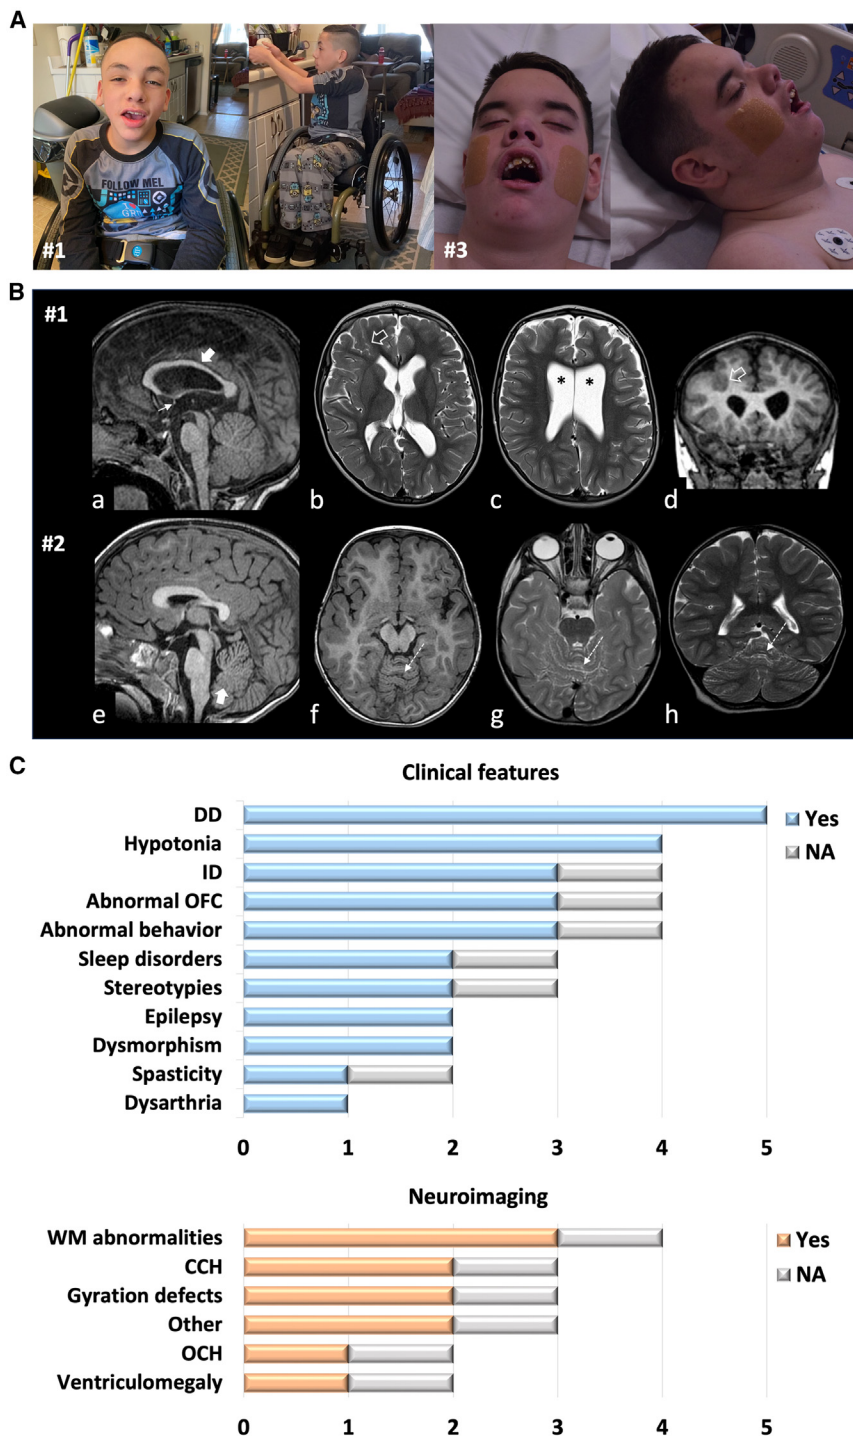

**Figure 2. Clinical and neuroimaging details of subjects harboring *DENND5B* variants**

(A) Clinical photographs of subjects harboring *DENND5B* variants. Subject #1 shows macrocephaly, mild intellectual disability, axial hypotonia, and appendicular spasticity. Facial dysmorphism includes arched and sparse eyebrows, narrow palpebral fissures, hypertelorism, bulbous nose tip, deep nasal bridge, thick lower lip, and prominent chin. Subject #3 has severe cognitive deficiency, microcephaly, and hypotonia. Dysmorphic features include short nose, hypertelorism, malposition of teeth, deep nasal bridge, deep philtrum, and micrognathia.

(B) Neuroimaging findings. (a–d) Brain MRI of subject #1 with sagittal T1-weighted (a), axial T2-weighted (b, c), and coronal T1-weighted (d) showing a thin corpus callosum (thick arrow), a small anterior commissure (thin arrow), white matter volume loss with ventricular enlargement (asterisks), and a focal gyral anomaly with infolding in the right frontal lobe (empty arrows). (e–h) Brain MRI of subject #2 with sagittal T1-weighted (e), axial T1-weighted (f), axial T2-weighted (g), and coronal T2-weighted (h) revealing focal foliar anomaly in the superior cerebellar vermis (dashed arrows) associated with inferior vermis hypoplasia (thick arrow).

(C) Histogram graphs showing the distribution of clinical features and brain MRI abnormalities in the cohort of subjects harboring *DENND5B* variants. Abbreviations: CCH, corpus callosum hypoplasia; DD, developmental delay; ID, intellectual disability; NA, not available; OFC, optic chiasm hypoplasia; OFC, optic chiasm circumference; WM, white matter.

reduced, especially the p.Ser800Leu mutant (Figures 3A and 3B).

### *DENND5B* variants affect lipid uptake and distribution in heterologous expression systems

DENN domain-containing proteins act as GEFs for Rab proteins, thus regulating intracellular organelles and vesicles, and, in turn, membrane trafficking. Based on this observation and

cervical cancer) and CFPAC-1 (derived from a ductal pancreatic adenocarcinoma). At early timepoints, no difference was observed in the increase over time of the TagBFP2 signal that identifies cells transfected with the different *DENND5B* forms (Figure S1). We observed that in HeLa cells and CFPAC-1, transfection with the WT-*DENND5B* construct increased *DENND5B* protein accumulation between 2- and 3-fold as compared to the endogenous protein, while the accumulation of mutant forms appeared to be significantly

the recent evidence that the *Dennd5b*<sup>-/-</sup> mouse model shows a relevant impairment of lipid distribution and metabolism,<sup>12</sup> we decided to evaluate whether abnormal *DENND5B* levels led to impaired uptake and distribution of specific lipid probes. To this aim, we exploited high-content confocal imaging and analysis to monitor intracellular uptake and distribution of fluorescent C6-ceramide or C12-sphingomyelin in HeLa cells transiently transfected with the constructs encoding the WT or *DENND5B* mutants,

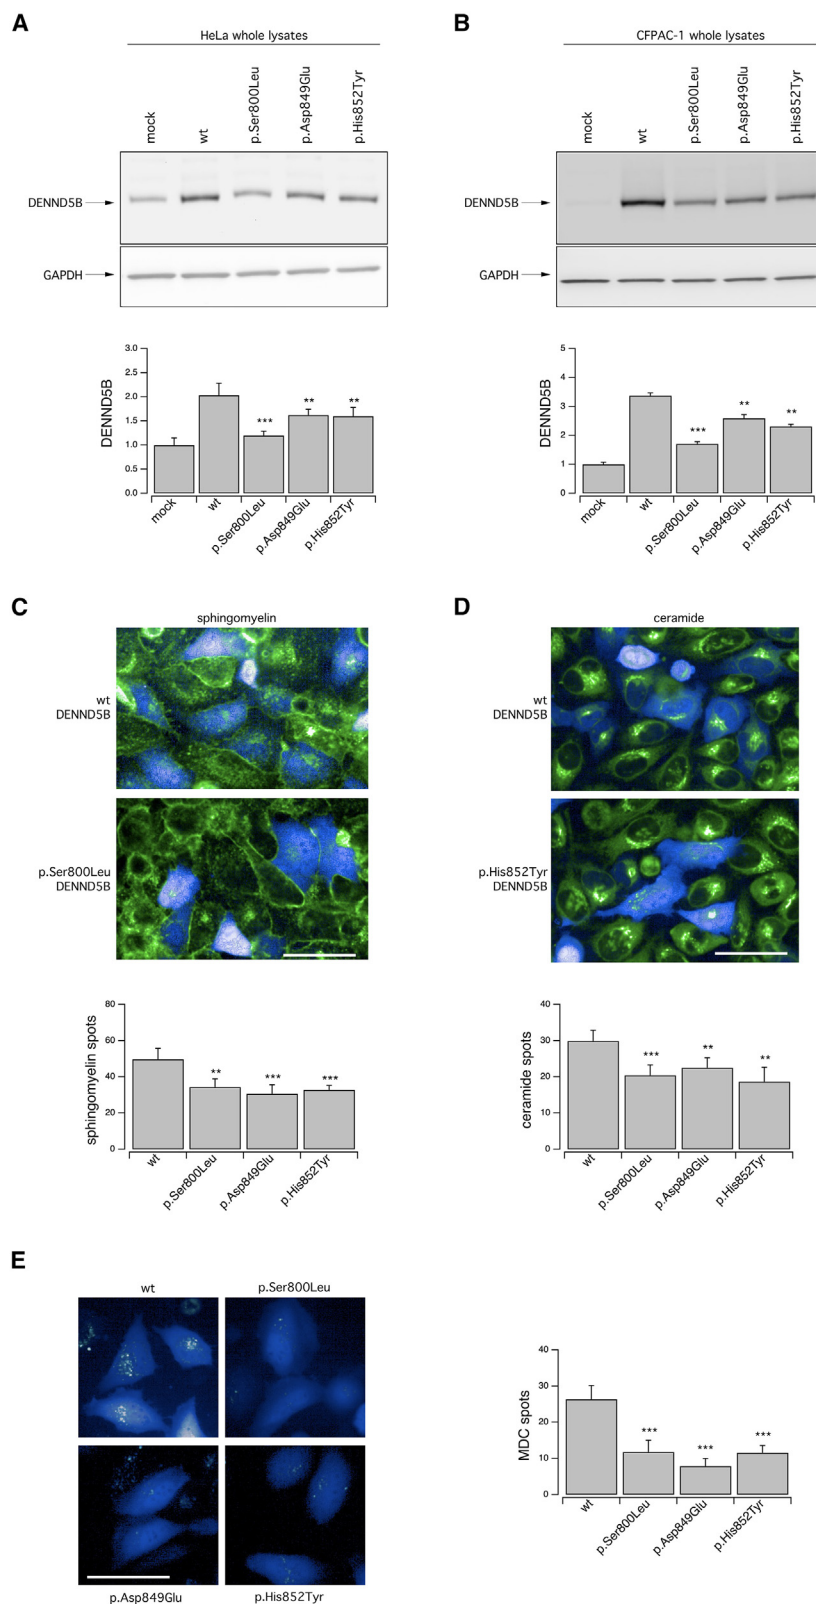

**Figure 3. Biochemical and functional analysis of WT and mutant DENND5B proteins in heterologous expression systems**

DENND5B proteins were transiently expressed in different cell models by means of vectors encoding the different DENND5B proteins and a TagBFP2-based expression marker that allowed easy monitoring of transfection efficiency.

(A and B) Western blot analysis (top) and densitometric quantification (bottom) of the levels of the WT, p.Ser800Leu, p.Asp849Glu, and p.His852Tyr DENND5B proteins in whole lysates of HeLa (A) and CFPAC-1 (B) cells. Lysates of mock-transfected parental cells have been included to show the expression level of the endogenous DENND5B protein in the corresponding cell model. Data are means  $\pm$  SEM ( $n = 3$ ).

(C and D) Representative confocal microscopy images (top) of C12-sphingomyelin (C) or C6-ceramide (D) uptake and quantification (bottom) of fluorescent spots resembling intracellular vesicles containing the corresponding lipid probe. The uptake was assayed on HeLa cells following transient expression of the WT, p.Ser800Leu, p.Asp849Glu, and p.His852Tyr DENND5B constructs. Quantification of spots was performed on TagBFP2-positive cells. Data are means  $\pm$  SEM ( $n = 5$ ). For each independent biological replicate, a region measuring  $1,320 \times 1,320 \mu\text{m}$  was imaged and analyzed, comprising approximately 35–40 TagBFP2-positive cells.

(E) Representative confocal microscopy images (left) and quantification (right) of fluorescent spots resembling autophagic vacuoles visualized using the MDC probe on HeLa cells following transient expression of the WT, p.Ser800Leu, p.Asp849Glu, and p.His852Tyr DENND5B constructs. Quantification of spots was performed on TagBFP2-positive cells. Data are means  $\pm$  SEM ( $n = 5$ ). For each independent biological replicate, a region measuring  $1,320 \times 1,320 \mu\text{m}$  was imaged and analyzed, comprising approximately 35–40 TagBFP2-positive cells. Asterisks indicate statistical significance vs. control (WT-DENND5B-transfected cells): \*\* $p < 0.01$ ; \*\*\* $p < 0.001$ . Scale bar =  $100 \mu\text{m}$ .

also bearing a TagBFP2 as expression marker. We therefore measured the intracellular uptake of the fluorescent probes only in cells that were also expressing the BFP, thus overexpressing either the WT or DENND5B mutant proteins. Cells were exposed to the fluorescent lipid probes that were added

to the medium and, after 30 min, their uptake and intracellular distribution were evaluated by quantifying, for each BFP-expressing cell, the number of fluorescent spots resembling intracellular vesicles containing fluorescent lipids. Interestingly, we observed that the uptake of both sphingomyelin and ceramide was decreased in cells expressing mutant DENND5B (Figures 3C, 3D, and S2).

We then exploited monodansylcadaverine (MDC), a specific marker for autolysosomes.<sup>22</sup> When cells are exposed to MDC, the probe is internalized and accumulated inside autophagosomes. Following fusion of autophagosomes with lysosomes, MDC fluorescence increases due to the

acidic environment. We therefore quantified, for each BFP-expressing cell, the number of fluorescent MDC spots resembling autophagic vacuoles in HeLa cells overexpressing either the WT or DENND5B mutants (Figure 3E). Resembling what we had observed when assessing internalization and intracellular trafficking of lipid cargoes, the number of MDC-positive spots was markedly reduced in cells expressing DENND5B variants compared to WT (Figure 3E).

#### **DENND5B variants result in decreased protein levels in affected individuals' fibroblasts**

We then isolated fibroblasts from subjects #2 and #3, harboring the p.Ser800Leu and p.Asp849Glu variants, respectively. These changes affect conserved residues within the RUN1 domain, where most of the variants identified in our cohort are localized. For comparison, we utilized already bio-banked fibroblasts derived from four non-NDD donors (i.e., subjects carrying neither DENND5B variants, nor variants in genes related to neurodevelopmental conditions nor, more in general, in genes related to intracellular organelles and vesicles, or involved in membrane trafficking). Immunolocalization of DENND5B revealed that, in fibroblasts derived from affected individuals, the accumulation of the protein was severely decreased, although no changes in its intracellular distribution were detected (Figure 4A). After separation by SDS-PAGE, DENND5B protein level was then analyzed in fibroblast lysates by western blotting, confirming a marked reduction of the p.Ser800Leu mutant accumulation (Figure 4B).

#### **DENND5B variants impair lipid uptake and intracellular distribution dynamics in affected individuals' fibroblasts**

We therefore evaluated the uptake of lipid cargoes by high-content confocal imaging (Figures 4C and 4D). Uptake of C12-sphingomyelin, quantified as the number of fluorescent spots at 30 min after addition of the probe, was significantly impaired in fibroblasts derived from affected individuals (Figure 4C). To further investigate whether DENND5B variants may also impact vesicle trafficking dynamics, we performed a kinetic analysis of fluorescent C6-ceramide intracellular distribution. We demonstrated that not only the uptake but also the time-course distribution of the probe was significantly slowed down in fibroblasts with DENND5B variants (Figure 4D).

Then, we wondered whether DENND5B variants may adversely impact the interaction with RAB39A. To this aim, we performed immunolocalization of RAB39 and DENND5B on fibroblasts derived from the enrolled affected individuals and control subjects. Unfortunately, we could not detect any RAB39A signal, suggesting that either the protein is not expressed in fibroblasts, or the antibody does not recognize the specific epitope, despite different commercially available antibodies being used (data not shown). We therefore used a computational approach to model the DENND5B-RAB39A interaction for the WT and variant DENND5B proteins.

#### **DENND5B variants are predicted to disrupt protein folding**

We generated an *in silico* DENND5B-RAB39A model to assess the potential impact of DENND5B variants on this interaction. Models of DENND5 bound to RAB39A generated with ColabFold (AlphaFold2 derivative) had high confidence (pLDDT > 0.8) for the variants (Figure 5, interactive at <https://michelangelo.sgc.ox.ac.uk/r/dennd5b>). Visual inspection and molecular thermodynamics suggest that all the variants disrupt the structure of the protein fold (Figure 5), possibly explaining at least in part the decreased protein accumulation observed in our previous experiments. Intriguingly, except for the highly destabilizing p.Ser800Leu, the variants are found at the interfaces between domains. The p.Ser559Leu and p.Arg749His variants are 8 Å away on the different sides of the dDENN and RUN1 domain interface, while p.Asp849Glu and p.His852-Tyr are in the same direction on the same helix at the interface between the RUN1 and PLAT domains. None of the variants are directly located at the interface with the RAB GTPase. In the five predicted models, two different packing solutions for this interface are seen with the opposite domain shifting by 1 Å. Given the very high confidence of these residues (>0.9), it cannot be ruled out that these are two biologically relevant states reflecting active or inactive guanine nucleotide exchange states.

#### **Discussion**

In this study, we describe a complex neurodevelopmental disorder associated with heterozygous *de novo* variants in DENND5B, encoding a GEF relevant to the activation of Rab family proteins, which are crucial regulators of intracellular vesicular trafficking.<sup>1,2</sup> Affected individuals presented with mild cognitive impairment, behavioral disorders, and a spectrum of brain MRI abnormalities featuring white matter involvement and cortical gyration defects. Facial dysmorphism and heterogeneous extra-neurological manifestations were observed in some affected individuals, featuring developmental defects involving the visual, cardiac, skeletal, and gastrointestinal systems. Functional investigation of DENND5B variants demonstrated that these non-synonymous changes affect protein accumulation, possibly due to an impairment of protein folding, and disrupt lipid uptake and intracellular distribution, also affecting the dynamics of vesicle trafficking.

DENND5B interacts with different members of the Rab family, including Rab6 and Rab39.<sup>8</sup> Variants in genes encoding Rab proteins are implicated in the pathogenesis of several human diseases, including neurological disorders.<sup>3,23</sup> Recurrent *de novo* loss-of-function variants in RAB11B (MIM: 604198) leading to altered GDP/GTP binding cause a neurodevelopmental syndrome with epilepsy, ataxia, abnormal vision, and musculoskeletal abnormalities (NDAGSCW [MIM: 617807]).<sup>24</sup> DENND5B does not directly interact with RAB11B. However, some clinical

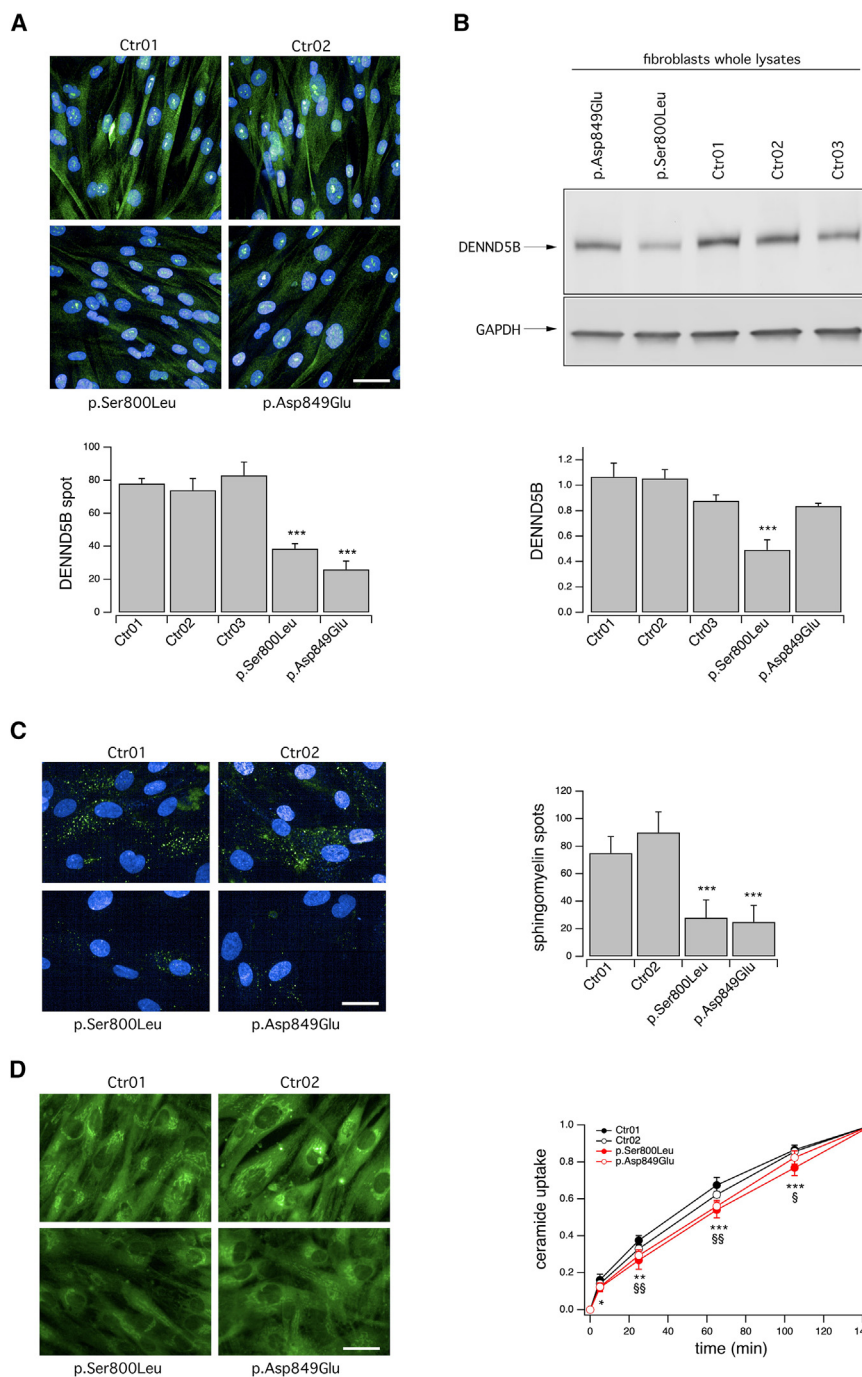

**Figure 4. Biochemical and functional characterization of *DENND5B* variants in affected subjects' fibroblasts**

(A) Representative confocal microscopy images (top) and quantification (bottom) of DENND5B-positive spots following immunolocalization of DENND5B protein in fibroblasts derived from subjects #2 and #3, carrying, respectively, the p.Ser800Leu and p.Asp849Glu variant and, for comparison, fibroblasts derived from non-NDD subjects.

(B) Western blot analysis (top) and densitometric quantification (bottom) of the DENND5B levels in whole lysates of fibroblasts derived from affected individuals and control subjects. Data are means  $\pm$  SEM (n = 5).

(C) Representative confocal microscopy images (left) of C12-sphingomyelin uptake and quantification (right) of fluorescent spots resembling intracellular vesicles containing the lipid probe. The uptake was assayed on fibroblasts derived from affected individuals and control subjects. Data are means  $\pm$  SEM (n = 9).

(D) Representative confocal microscopy images (left) of C6-ceramide uptake and intracellular distribution and its quantification (right). The uptake was assayed on fibroblasts derived from affected individuals and control subjects. Data are means  $\pm$  SEM (n = 9). For each independent biological replicate, a region measuring  $990 \times 1,320 \mu\text{m}$  was imaged and analyzed, comprising approximately one hundred fibroblasts. Asterisks indicate statistical significance: \*p < 0.05; \*\*p < 0.01; \*\*\*p < 0.001 for p.Ser800Leu fibroblasts vs. pool of control fibroblasts; §p < 0.05; §§p < 0.01; for p.Asp849Glu fibroblasts vs. pool of control fibroblasts. Scale bar = 100  $\mu\text{m}$ .

manifestations observed in the subjects enrolled in our study are crucial features of NDAGSCW, such as cerebellar involvement and musculoskeletal defects.<sup>24</sup> Loss-of-function variants in *RAB39B* (MIM: 300774) may result in a similar neurodevelopmental disorder (XLID72 [MIM: 300271]) or in a distinct condition with intellectual disability and early-onset Parkinsonism (Waisman syndrome [MIM: 311510]).<sup>25–27</sup> Subjects harboring *DENND5B* variants show clinical features common to these two conditions, especially XLID72, suggesting that the disruption of DENND5B-Rab39 interaction may contribute to the pathogenesis of the *DENND5B*-related neurodevelopmental

disorder. The presence of gyration defects is an interesting MRI feature of subjects harboring *DENND5B* variants, since the proper orchestration of vesicle trafficking is crucial for the development of the nervous system.<sup>28</sup> Indeed, among other effects, vesicle-mediated signaling defects

may impact the migration of neuronal progenitors during cortical development and alter oligodendrocyte biology.<sup>29</sup> The *DENND5B* variants detected in our cohort are predicted to disrupt protein folding and to impair DENND5B-mediated lipid uptake and distribution. *DENND5B* shows a high intolerance to missense changes (observed/expected variants ratio = 0.63, range 0.58–0.68) and loss of function (observed/expected variants ratio = 0.07, range 0.03–0.15).<sup>30</sup> These observations support the association between loss-of-function *DENND5B* variants and the neurodevelopmental phenotypes observed in the affected individuals enrolled in our study. The missense changes detected in

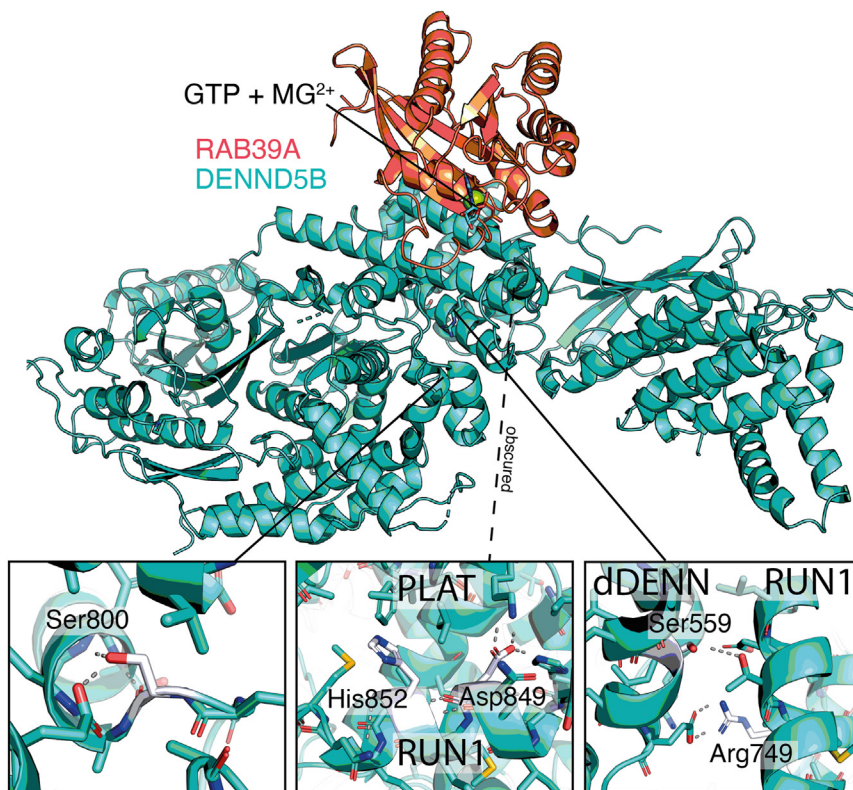

**Figure 5.** *In silico* analysis of *DENND5B* variants

Serine 559 (mutated to leucine in #4) is localized in the dDENN domain. This is a surface mutation facing and in close proximity to the RUN domain, within 5 Å of threonine 776, which is the length of a water bridge. Arginine 749 (histidine 749 in #5) is in the 1st RUN domain. This is a surface variant facing the dDENN domain and act as potentially pathogenic via the same mechanism as p.Ser559Leu. Serine 800 (leucine 800 in #2) is in the 1st RUN domain. This is the last residue in a turn and forms a hydrogen bond with glutamate 786 in the previous helix via its side chain, which would be lost in a leucine variant. In fact, predictions suggest it to be highly destabilizing (>10 kcal/mol). Aspartate 849 (glutamate 849 in #3) is localized in the 1st RUN domain. This buried charged residue forms salt bridges with lysine 876 and histine 882. Despite the similarity of the two residues, glutamate is longer and predictions suggest it to be highly destabilizing (6 kcal/mol). Histidine 852 (tyrosine 852 in #1) is localized in the 1st RUN domain. This buried residue is on the following rung of the helix as aspartate 849 and its side chain appears packed in two alternative conformations depending on the distance to  $\beta$ -hairpin 1015–1019 of the PLAT/LH2 (which shifts

by 1 Å). Both conformations form several hydrophobic interactions, but in the more distant conformation (shown), it forms  $\pi$ - $\pi$  interactions with tryptophan 927 and a  $\pi$ -sulfur interaction with methionine 856, while in the other it forms a hydrogen bond with the backbone of a preceding residue. If this actually represents two biologically relevant states, any change would disrupt this balance.

our cohort affect conserved residues within functional domains of *DENND5B* (Figure 1B). Three variants (p.Ser800-Leu, p.Asp849Glu, and p.His852Tyr) lie contiguously within RUN1, whereas the p.Arg749His variant is localized in close proximity of this domain. p.Ser559Leu affects a conserved residue within dDENN (downstream DENN). Both RUN1 and dDENN are crucial for protein function but, interestingly, they are not depleted of missense changes according to gnomAD (v.4.0.0) (Tables S6 and S7). Thus, it is possible that the involvement of specific residues within these domains causes recognizable cellular and clinical phenotypes. For example, p.Ser800Leu led to a marked decrease in protein levels compared to other changes and was associated with a distinctive gyration defect (Table 1). Interestingly, this same variant is present in a single heterozygous individual in gnomAD (v.4.0.0), suggesting the possibility of incomplete penetrance or the association with a milder neurological phenotype. Future studies will be crucial to dissect whether *DENND5B* variants lead to a complete loss of protein function or, rather, act as hypomorphs.

As the majority of *DENND5B* missense changes detected in our cohort affected the RUN1 domain, we investigated variants in this domain using different cellular approaches. Western blot and immunolocalization analyses revealed decreases of protein accumulation in both heterologous systems and fibroblasts obtained from affected subjects. This finding may be at least partially explained by a mis-

folding defect and subsequent premature degradation mediated by the proteasome, as suggested by the *in silico* analysis performed on our *DENND5B*-RAB39A model. Functional investigation of the variants demonstrated that the reduced protein levels led to a significant impairment of intracellular uptake and distribution of lipid cargoes, supporting a role of *DENND5B* in the regulation of the endosomal system and intracellular membrane trafficking pathways. Although further confirmation is needed, we also demonstrated that *DENND5B* deficiency causes a slowdown of these processes, suggesting that *DENND5B* activity is important to maintain the appropriate dynamics of vesicle trafficking. Additionally, MDC-based assay revealed a decreased number of autophagic vacuoles in mutant cells, suggesting that *DENND5B* deficiency may impact autophagy pathways. The processes affected by *DENND5B* deficiency are crucial for many functions in neuronal cells, including axonal transport, synaptic function, and synaptic plasticity.<sup>7,16,17</sup> Thus, it is possible that the *DENND5B* variants detected in the subjects enrolled in our study cause significant neuronal functional damage, accounting for the observed neurodevelopmental and epileptic phenotypes.

Abnormal head circumference is present in different neurodevelopmental conditions, including disorders caused by variable defects in vesicle trafficking pathways.<sup>31–33</sup> Microcephaly secondary to abnormal proliferation of neural

progenitors has been directly associated with endosomal trafficking defects, whereas macrocephaly is part of the phenotype of many NDDs caused by the dysfunction of vesicle trafficking regulators, such as *RAC1*- (MIM: 602048) and *RAB39B*-related disorders.<sup>25,33–37</sup> The presence of either microcephaly (subject #3) or macrocephaly (subjects #1 and #2) in our cohort may be the result of the different functional impact of *DENND5B* variants. In addition to a shared deleterious effect on protein levels, the variants identified in these subjects might affect RUN1 functions in the residual portion of functional protein in a variant-specific manner. For example, *RAB6* controls the dynamic balance between the formation and turnover of autophagosomes, and loss of *RAB6* results in a significant reduction of cell size.<sup>38</sup> Thus, a more or less severe impairment of *DENND5B*-*RAB6* interaction might contribute to the different brain size in subjects #1, #2, and #3. During brain development, autophagy plays a crucial role in the fine regulation of neurogenesis, neuronal maturation, and cell survival.<sup>39–42</sup> These events are crucial for brain growth and microcephaly is common in neurodevelopmental conditions caused by autophagy dysregulation.<sup>43,44</sup> Our MDC-based assay showed that *DENND5B* variants impact on autophagy-related processes, suggesting that autophagy defects may contribute to determine brain size in subjects harboring *DENND5B* variants. Comprehensively, different *DENND5B* variants might lead to the disruption of specific functional pathways, underlying distinctive patterns of abnormal neurodevelopment and cranial growth defects.

Epileptic manifestations were observed in two affected individuals in our cohort. *DENND5B* levels were found to be reduced in the brains of subjects with temporal lobe epilepsy and in two distinct chronic epileptic mouse models (kainic acid [KA] and pentylenetetrazole [PTZ] kindling mice), suggesting that *DENND5B* expression correlates with epileptogenesis.<sup>7</sup> *Dennd5b* knockdown leads to increased epileptic discharge and reduced incubation period, whereas its overexpression results in the opposite phenotype.<sup>7</sup> Interestingly, epileptic manifestations are part of the core phenotype of *XLID72* and *DEE49*, two conditions showing a certain overlap with *DENND5B*-related disorder.<sup>16,25</sup> *DENND5* proteins also interact with *SNX1*, which is implicated in the regulation of the physiological trafficking of the group I metabotropic glutamate receptors (mGluRs) receptors (mGluR1 and mGluR5).<sup>10</sup> These receptors are crucial for synaptic plasticity and their dysfunction may lead to intellectual disability, epilepsy, and ASD.<sup>45</sup> Interacting with *RAB6* and *DENND5* proteins, the N terminus of *SNX1* can determine vesicle specificity, while the C-terminal PX (Phox-homology) and BAR (Bin, amphiphysin, and Rvs) domains exert the lipid attachment.<sup>9</sup> Thus, an abnormal *DENND5B*-*SNX1* binding might disrupt vesicle transport between early endosomes and TGN, possibly affecting synaptic function and determining increased epileptogenesis.<sup>10</sup>

The *DENND5B* variants identified in our cohort segregated with the clinical phenotypes in a dominant manner.

This is uncommon in human disorders resulting from dysregulated GEF activity, which mostly occur in the presence of bi-allelic deleterious variants.<sup>16,46</sup> However, rare dominant conditions have been also reported. For example, heterozygous loss-of-function variants in *FLCN* (MIM: 607273) cause a complex genodermatosis known as Birt-Hogg-Dube syndrome (MIM: 135150).<sup>47</sup> *FLCN* encodes folliculin, a regulator of vesicle trafficking that interacts with Rab GTPases and contains a C-terminal DENN-like domain.<sup>48</sup> Although Folliculin acts as a GEF for *RAB35*, it also activates other Rabs using different mechanisms.<sup>49–51</sup> It facilitates the binding of *RAB34* to its effector RILP and the loading of *PAT1*, an important regulator of early endocytosis, on *RAB11A*.<sup>50,51</sup> Resembling *FLCN*, dominant *DENND5B* variants could be deleterious through different mechanisms, regardless of a decreased GEF activity. This is also suggested by their enrichment in the RUN1 domain. *DENND5B* variants could disrupt *DENND5B*-Rabs interactions, impairing the binding to crucial effectors with a regulatory role in vesicle trafficking.<sup>1,2,46,51</sup> The haploinsufficiency model in *DENND5B*-related disorder is also supported by the observation that the lentiviral-mediated knockdown of *Dennd5b* in mouse results in a roughly 50% decrease of functional protein, leading to a severe epileptic phenotype.<sup>7</sup> Conversely, *DENND5B* polymorphisms associated with lipid homeostasis abnormalities follow a recessive inheritance pattern and are predicted to result in mild deleterious effects (Table S8). Thus, these polymorphisms might act through different mechanisms in the context of a predisposing genetic background.<sup>12–15</sup> Overall, a single functional allele of *DENND5B* may not be sufficient to guarantee the physiological activity of the protein, supporting a disease model where heterozygous loss-of-function variants cause abnormal membrane trafficking and neurodevelopmental disorder.

In conclusion, we report a complex neurodevelopmental condition featuring cognitive impairment, variable epilepsy, and brain abnormalities in association with heterozygous *de novo* loss-of-function variants in *DENND5B*. Biochemical studies confirmed that *DENND5B* variants result in a decreased protein levels, and the functional investigation of the variants demonstrated a significant impact on the intracellular lipid metabolism and vesicle transport. Collectively, our findings support the role of loss-of-function variants in *DENND5B* as the cause of a distinctive neurodevelopmental condition, highlighting the crucial conserved role of *DENND5B* in brain development and reinforcing the association of *DENND5B* deficiency with increased epileptogenesis in human subjects.

## Data and code availability

The data used to support the conclusions in this paper are available from the corresponding author upon reasonable request. *In silico* data analysis is available at <https://github.com/matteoferla/Q6ZUT9-analyses>.

All variants were submitted to the Leiden Open Variation Database (LOVD) and ClinVar. The accession numbers for the *DENND5B* variants reported in this paper are LOVD: #0000932979, #0000932981, #0000932982, #0000932983, #0000932984, #0000932985, and #0000932986. The accession numbers for the *DENND5B* variants reported in this paper are ClinVar: VCV002664959.1, VCV002664958.1, VCV002664957.1, VCV002664956.1, and VCV002664955.1.

## Supplemental information

Supplemental information can be found online at <https://doi.org/10.1016/j.ajhg.2024.02.001>.

## Acknowledgments

We thank the parents of the enrolled subjects for their consent to the publication of this paper and the continuous support of our work. M.P.F. is funded by a Rosetrees Fund award (M940). This study has been funded by the Italian Ministry of Health (grant RF-2016-02361949 to F.Z.) and by Compagnia di San Paolo (grant ROL:32628 to F.Z.). E.B., A.B., J.A.P. III, and M.E. are grateful to the studied subject for participating in the Undiagnosed Diseases Network (UDN) and this work was supported in part by the NIH Common Fund, NIH/NHGRI grant 9U01NS134349-10. This research was also supported by PNRR-MUR-M4C2 PE0000006 Research Program “MNESYS”—A multiscale integrated approach to the study of the nervous system in health and disease. IRCCS ‘G. Gaslini’ is a member of ERN-Epicare.

## Author contributions

M. Scala conceived the project in collaboration with V.T., V.S., N.P., and F.Z. M. Scala assembled the study cohort, performed genetic and clinical characterization, and delineated the genotype-phenotype spectrum. V.T., M.L., and N.P. performed the biochemical analyses and exploited the high-content imaging and analysis in living cells. M.F. generated the *in silico* *DENND5B*-RAB39A model. J.S.C., A.F., E.B., A.B., J.A.P. III, M.E.K., M.N., M.R., K.S., N.B., I.M., S.T., S.B., M.I., P. Scudieri, Undiagnosed Diseases Network, J.A.R., G.B., S.R., H.A.S., R.S.R., M.B.W., V.C., A.C., S.G., S.M.R., M.P.F., I.H., P. Striano, and M. Severino participated in genetic investigations, clinical assessment, neuroimaging assessment, and data sharing; F.Z. supervised the project. M. Scala wrote the first draft of the manuscript with inputs and revisions from V.T., V.S., N.P., and F.Z.

## Declaration of interests

A.C. is an employee of GeneDx, LLC. The Department of Molecular and Human Genetics at Baylor College of Medicine receives revenue from clinical genetic testing completed at Baylor Genetics Laboratories.

Received: August 31, 2023

Accepted: February 1, 2024

Published: February 21, 2024

## Web resources

ClinVar, <https://www.ncbi.nlm.nih.gov/clinvar>

Combined Annotation Dependent Depletion (CADD), <http://cadd.gs.washington.edu>  
 DECIPHER, <https://decipher.sanger.ac.uk>  
 Ensembl Variant Effect Predictor (VEP), <https://www.ensembl.org/info/docs/tools/vep/index.html>  
 GenBank, <https://www.ncbi.nlm.nih.gov/genbank/>  
 Gene Cards, <https://www.genecards.org>  
 Gene Matcher, <http://www.genematcher.org>  
 Genome Aggregation Database (GnomAD), <http://gnomad.broadinstitute.org>  
 Genomic Evolutionary Rate Profiling (GERP), <http://mendel.stanford.edu/SidowLab/downloads/gerp/>  
 Mutation Taster, <http://www.mutationtaster.org>  
 NeXtProt, <https://www.nextprot.org>  
 Online Mendelian Inheritance in Man, <https://www.ncbi.nlm.nih.gov/Omim>  
 PubMed, <https://www.ncbi.nlm.nih.gov/pubmed>  
 RefSeq, <https://www.ncbi.nlm.nih.gov/refseq>  
 SIFT, <https://sift.bii.a-star.edu.sg>  
 UniProt, <https://www.uniprot.org>  
 UCSC Human Genome Database, <https://www.genome.ucsc.edu>  
 Varsome, <https://varsome.com>

## References

- Marat, A.L., Dokainish, H., and McPherson, P.S. (2011). DENN domain proteins: regulators of Rab GTPases. *J. Biol. Chem.* 286, 13791–13800.
- Yoshimura, S.I., Gerondopoulos, A., Linford, A., Rigden, D.J., and Barr, F.A. (2010). Family-wide characterization of the DENN domain Rab GDP-GTP exchange factors. *J. Cell Biol.* 191, 367–381.
- Homma, Y., Hiragi, S., and Fukuda, M. (2021). Rab family of small GTPases: an updated view on their regulation and functions. *FEBS J.* 288, 36–55.
- Zerial, M., and McBride, H. (2001). Rab proteins as membrane organizers. *Nat. Rev. Mol. Cell Biol.* 2, 107–117.
- Mignogna, M.L., and D’Adamo, P. (2018). Critical importance of RAB proteins for synaptic function. *Small GTPases* 9, 145–157.
- Banworth, M.J., and Li, G. (2018). Consequences of Rab GTPase dysfunction in genetic or acquired human diseases. *Small GTPases* 9, 158–181.
- Huang, Y., Zhu, Y., He, W., Zhang, Y., Peng, T., Gou, C., Hou, C., Yu, J., Wang, X., and Jiang, G. (2021). Altered expression of *DENND5B* in patients with epilepsy and its regulation of seizures in mice. *Epilepsy Res.* 178, 106817.
- Miserey-Lenkei, S., Waharte, F., Boulet, A., Cuif, M.H., Tenza, D., El Marjou, A., Raposo, G., Salamero, J., Héliot, L., Goud, B., and Monier, S. (2007). Rab6-interacting protein 1 links Rab6 and Rab11 function. *Traffic* 8, 1385–1403.
- Fernandes, H., Franklin, E., Jollivet, F., Bliedtner, K., and Khan, A.R. (2012). Mapping the interactions between a RUN domain from *DENND5*/Rab6IP1 and sorting nexin 1. *PLoS One* 7, e35637.
- Sharma, R., Gulia, R., and Bhattacharyya, S. (2018). A Critical Role for Sorting Nexin 1 in the Trafficking of Metabotropic Glutamate Receptors. *J. Neurosci.* 38, 8605–8620.
- Recacha, R., Boulet, A., Jollivet, F., Monier, S., Houdusse, A., Goud, B., and Khan, A.R. (2009). Structural basis for recruitment of Rab6-interacting protein 1 to Golgi via a RUN domain. *Structure* 17, 21–30.

12. Gordon, S.M., Neufeld, E.B., Yang, Z., Pryor, M., Freeman, L.A., Fan, X., Kullo, I.J., Biesecker, L.G., and Remaley, A.T. (2019). DENND5B Regulates Intestinal Triglyceride Absorption and Body Mass. *Sci. Rep.* 9, 3597.
13. Mobilia, M., Whitus, C., Karakashian, A., Lu, H.S., Daugherty, A., and Gordon, S.M. (2022). Dennd5b-Deficient Mice are Resistant to PCSK9-Induced Hypercholesterolemia and Diet-Induced Hepatic Steatosis. *J. Lipid Res.* 63, 100296.
14. Biesecker, L.G., Mullikin, J.C., Facio, F.M., Turner, C., Cherukuri, P.E., Blakesley, R.W., Bouffard, G.G., Chines, P.S., Cruz, P., Hansen, N.F., et al. (2009). The ClinSeq Project: piloting large-scale genome sequencing for research in genomic medicine. *Genome Res.* 19, 1665–1674.
15. Ye, Z., Kalloo, F.S., Dalenber, A.K., and Kullo, I.J. (2013). An electronic medical record-linked biorepository to identify novel biomarkers for atherosclerotic cardiovascular disease. *Glob. Cardiol. Sci. Pract.* 2013, 82–90.
16. Han, C., Alkhat, R., Froukh, T., Minassian, A.G., Galati, M., Liu, R.H., Fotouhi, M., Sommerfeld, J., Alfrook, A.J., Marshall, C., et al. (2016). Epileptic Encephalopathy Caused by Mutations in the Guanine Nucleotide Exchange Factor DENND5A. *Am. J. Hum. Genet.* 99, 1359–1367.
17. Sobreira, N., Schiettecatte, F., Valle, D., and Hamosh, A. (2015). GeneMatcher: a matching tool for connecting investigators with an interest in the same gene. *Hum. Mutat.* 36, 928–930.
18. Richards, S., Aziz, N., Bale, S., Bick, D., Das, S., Gastier-Foster, J., Grody, W.W., Hegde, M., Lyon, E., Spector, E., et al. (2015). Standards and guidelines for the interpretation of sequence variants: a joint consensus recommendation of the American College of Medical Genetics and Genomics and the Association for Molecular Pathology. *Genet. Med.* 17, 405–424.
19. Subach, O.M., Gundorov, I.S., Yoshimura, M., Subach, F.V., Zhang, J., Grünwald, D., Souslova, E.A., Chudakov, D.M., and Verkhusha, V.V. (2008). Conversion of red fluorescent protein into a bright blue probe. *Chem. Biol.* 15, 1116–1124.
20. Ferla, M.P., Pagnamenta, A.T., Koukouflis, L., Taylor, J.C., and Marsden, B.D. (2022). Venus: Elucidating the Impact of Amino Acid Variants on Protein Function Beyond Structure Destabilisation. *J. Mol. Biol.* 434, 167567.
21. Ferla, M.P., Pagnamenta, A.T., Damerell, D., Taylor, J.C., and Marsden, B.D. (2020). MichelaNglo: sculpting protein views on web pages without coding. *Bioinformatics* 36, 3268–3270.
22. Biederick, A., Kern, H.F., and Elsässer, H.P. (1995). Monodansylcadaverine (MDC) is a specific in vivo marker for autophagic vacuoles. *Eur. J. Cell Biol.* 66, 3–14.
23. Kiral, F.R., Kohrs, F.E., Jin, E.J., and Hiesinger, P.R. (2018). Rab GTPases and Membrane Trafficking in Neurodegeneration. *Curr. Biol.* 28, R471–R486.
24. Lamers, I.J.C., Reijnders, M.R.F., Venselaar, H., Kraus, A., DDD Study, Jansen, S., de Vries, B.B.A., Houge, G., Gradek, G.A., Seo, J., et al. (2017). Recurrent De Novo Mutations Disturbing the GTP/GDP Binding Pocket of RAB11B Cause Intellectual Disability and a Distinctive Brain Phenotype. *Am. J. Hum. Genet.* 101, 824–832.
25. Giannandrea, M., Bianchi, V., Mignogna, M.L., Sirri, A., Carra-bino, S., D'Elia, E., Vecellio, M., Russo, S., Cogliati, F., Larizza, L., et al. (2010). Mutations in the small GTPase gene RAB39B are responsible for X-linked mental retardation associated with autism, epilepsy, and macrocephaly. *Am. J. Hum. Genet.* 86, 185–195.
26. Wilson, G.R., Sim, J.C.H., McLean, C., Giannandrea, M., Galea, C.A., Riseley, J.R., Stephenson, S.E.M., Fitzpatrick, E., Haas, S.A., Pope, K., et al. (2014). Mutations in RAB39B cause X-linked intellectual disability and early-onset Parkinson disease with  $\alpha$ -synuclein pathology. *Am. J. Hum. Genet.* 95, 729–735.
27. Ciammola, A., Carrera, P., Di Fonzo, A., Sassone, J., Villa, R., Poletti, B., Ferrari, M., Girotti, F., Monfrini, E., Buongarzone, G., et al. (2017). X-linked Parkinsonism with Intellectual Disability caused by novel mutations and somatic mosaicism in RAB39B gene. *Parkinsonism Relat. Disord.* 44, 142–146.
28. Winkle, C.C., and Gupton, S.L. (2016). Membrane Trafficking in Neuronal Development: Ins and Outs of Neural Connectivity. *Int. Rev. Cell Mol. Biol.* 322, 247–280.
29. Reiter, C.R., and Bongarzone, E.R. (2020). The Role of Vesicle Trafficking and Release in Oligodendrocyte Biology. *Neurochem. Res.* 45, 620–629.
30. Karczewski, K.J., Francioli, L.C., Tiao, G., Cummings, B.B., Al-földi, J., Wang, Q., Collins, R.L., Laricchia, K.M., Ganna, A., Birnbaum, D.P., et al. (2020). The mutational constraint spectrum quantified from variation in 141,456 humans. *Nature* 581, 434–443.
31. Guzik, A., Perenc, L., Druzbicki, M., and Podgórska-Bednarsz, J. (2021). Abnormal cranium development in children and adolescents affected by syndromes or diseases associated with neurodysfunction. *Sci. Rep.* 11, 2908.
32. Accogli, A., Geraldo, A.F., Piccolo, G., Riva, A., Scala, M., Balagura, G., Salpietro, V., Madia, F., Maghnie, M., Zara, F., et al. (2021). Diagnostic Approach to Macrocephaly in Children. *Front. Pediatr.* 9, 794069.
33. García-Cazorla, A., Oyarzábal, A., Saudubray, J.M., Martinelli, D., and Dionisi-Vici, C. (2022). Genetic disorders of cellular trafficking. *Trends Genet.* 38, 724–751.
34. Carpentieri, J.A., Di Cicco, A., Lampic, M., Andreau, D., Del Maestro, L., El Marjou, F., Coquand, L., Bahi-Buisson, N., Brault, J.B., and Baffet, A.D. (2022). Endosomal trafficking defects alter neural progenitor proliferation and cause microcephaly. *Nat. Commun.* 13, 16.
35. Woodbury-Smith, M., Deneault, E., Yuen, R.K.C., Walker, S., Zarrei, M., Pellicchia, G., Howe, J.L., Hoang, N., Uddin, M., Marshall, C.R., et al. (2017). Mutations in RAB39B in individuals with intellectual disability, autism spectrum disorder, and macrocephaly. *Mol. Autism.* 8, 59.
36. Scala, M., Nishikawa, M., Nagata, K.I., and Striano, P. (2021). Pathophysiological Mechanisms in Neurodevelopmental Disorders Caused by Rac GTPases Dysregulation: What's behind Neuro-RACopathies. *Cells* 10, 3395.
37. Scala, M., Nishikawa, M., Ito, H., Tabata, H., Khan, T., Accogli, A., Davids, L., Ruiz, A., Chiurazzi, P., Cericola, G., et al. (2022). Variant-specific changes in RAC3 function disrupt corticogenesis in neurodevelopmental phenotypes. *Brain* 145, 3308–3327.
38. Ayala, C.I., Kim, J., and Neufeld, T.P. (2018). Rab6 promotes insulin receptor and cathepsin trafficking to regulate autophagy induction and activity in Drosophila. *J. Cell Sci.* 131, jcs216127.
39. Kulkarni, A., Chen, J., and Maday, S. (2018). Neuronal autophagy and intercellular regulation of homeostasis in the brain. *Curr. Opin. Neurobiol.* 51, 29–36.
40. Kadir, R., Harel, T., Markus, B., Perez, Y., Bakhrat, A., Cohen, I., Volodarsky, M., Feintsein-Linial, M., Chervinski, E., Zlotogora, J., et al. (2016). ALFY-Controlled DVL3 Autophagy Regulates

- Wnt Signaling, Determining Human Brain Size. *PLoS Genet.* *12*, e1005919.
41. Nagayach, A., and Wang, C. (2024). Autophagy in neural stem cells and glia for brain health and diseases. *Neural Regen. Res.* *19*, 729–736.
  42. Corti, O., Blomgren, K., Poletti, A., and Beart, P.M. (2020). Autophagy in neurodegeneration: New insights underpinning therapy for neurological diseases. *J. Neurochem.* *154*, 354–371.
  43. Fleming, A., and Rubinsztein, D.C. (2020). Autophagy in Neuronal Development and Plasticity. *Trends Neurosci.* *43*, 767–779.
  44. Deng, Z., Zhou, X., Lu, J.H., and Yue, Z. (2021). Autophagy deficiency in neurodevelopmental disorders. *Cell Biosci.* *11*, 214.
  45. Su, L.D., Wang, N., Han, J., and Shen, Y. (2022). Group 1 Metabotropic Glutamate Receptors in Neurological and Psychiatric Diseases: Mechanisms and Prospective. *Neuroscientist* *28*, 453–468.
  46. Ishida, M., E Oguchi, M., Fukuda, M., and Fukuda, M. (2016). Multiple Types of Guanine Nucleotide Exchange Factors (GEFs) for Rab Small GTPases. *Cell Struct. Funct.* *41*, 61–79.
  47. Nickerson, M.L., Warren, M.B., Toro, J.R., Matrosova, V., Glenn, G., Turner, M.L., Duray, P., Merino, M., Choyke, P., Pavlovich, C.P., et al. (2002). Mutations in a novel gene lead to kidney tumors, lung wall defects, and benign tumors of the hair follicle in patients with the Birt-Hogg-Dubé syndrome. *Cancer Cell* *2*, 157–164.
  48. Zhao, L., Ji, X., Zhang, X., Li, L., Jin, Y., and Liu, W. (2018). FLCN is a novel Rab11A-interacting protein that is involved in the Rab11A-mediated recycling transport. *J. Cell Sci.* *131*, jcs218792.
  49. Zheng, J., Duan, B., Sun, S., Cui, J., Du, J., and Zhang, Y. (2017). Folliculin Interacts with Rab35 to Regulate EGF-Induced EGFR Degradation. *Front. Pharmacol.* *8*, 688.
  50. Starling, G.P., Yip, Y.Y., Sanger, A., Morton, P.E., Eden, E.R., and Dodding, M.P. (2016). Folliculin directs the formation of a Rab34-RILP complex to control the nutrient-dependent dynamic distribution of lysosomes. *EMBO Rep.* *17*, 823–841.
  51. Dilsizoglu Senol, A., Tagliafierro, L., Gorisse-Hussonnois, L., Rebeillard, F., Huguet, L., Geny, D., Contremoulins, V., Corlier, F., Potier, M.C., Chasseigneaux, S., et al. (2019). Protein interacting with Amyloid Precursor Protein tail-1 (PAT1) is involved in early endocytosis. *Cell. Mol. Life Sci.* *76*, 4995–5009.

## Supplemental information

### ***De novo* variants in *DENND5B* cause a neurodevelopmental disorder**

Marcello Scala, Valeria Tomati, Matteo Ferla, Mariateresa Lena, Julie S. Cohen, Ali Fatemi, Elly Brokamp, Anna Bican, John A. Phillips III, Mary E. Koziura, Michael Nicouleau, Marlene Rio, Karine Siquier, Nathalie Boddaert, Ilaria Musante, Serena Tamburro, Simona Baldassari, Michele Iacomino, Paolo Scudieri, Undiagnosed Diseases Network, Jill A. Rosenfeld, Gary Bellus, Sara Reed, Hind Al Saif, Rossana Sanchez Russo, Matthew B. Walsh, Vincent Cantagrel, Amy Crunk, Stefano Gustincich, Sarah M. Ruggiero, Mark P. Fitzgerald, Ingo Helbig, Pasquale Striano, Mariasavina Severino, Vincenzo Salpietro, Nicoletta Pedemonte, and Federico Zara

## **Supplemental Material**

### **1. Supplemental Methods**

### **2. Supplemental Results**

### **3. Supplemental Tables**

### **4. Supplemental Figures**

### **5. Supplemental References**

### **6. Supplemental information**

## **1. Supplemental Methods**

### ***1.1 Participants enrolment***

The patients investigated in this study were enrolled at several different international research centers and hospitals: Developmental Brain Disorders Laboratory, Imagine Institute, INSERM, Paris, France; Emory University, Atlanta, GA 30322, USA; Geisinger Medical Center, Danville, PA, USA; Kennedy Krieger Institute, Baltimore, Maryland, USA; Vanderbilt University Medical Center, Nashville, Tennessee, USA; Virginia Commonwealth University School of Medicine, Richmond, Virginia, USA.

### ***1.2 Exome sequencing analysis***

For exome sequencing (ES), genomic DNA was extracted from peripheral blood lymphocytes or buccal swab samples of the probands and parents (when available). After standard DNA extraction, exome sequencing (ES) (Trio-ES in subjects #1-4 and #7; proband-only ES in #5 and #6) was performed as previously described (Aspromonte et al., 2019; Bowling et al., 2017; Harripaul et al., 2017; Murdock et al., 2021; Tarailo-Graovac et al., 2016; Guillen Sacoto et al., 2020). QC statistics with FastQC (<http://www.bioinformatics.bbsrc.ac.uk/projects/fastqc>) was used to assess the quality of the sequence reads. BWA with default parameters was used for reads alignment to the reference human genome (GRCh38 - hg38, UCSC genome assembly). Recalibration of the quality score and for indel realignment and variant calling was performed through the HaplotypeCaller algorithm within the GATK package (DePristo et al., 2011; McKenna et al., 2010). Variants were then annotated with ANNOVAR (Wang et al., 2010) and filtered out for minor allele frequency (MAF)  $\leq$  0.01 in genomic databases (GnomAD v4.0.0, <https://gnomad.broadinstitute.org>). Afterwards, *in silico* tools were employed to predict the impact of candidate variants on protein structure and function, including: Combined Annotation Dependent Depletion (CADD, <https://cadd.gs.washington.edu>), Mutation Taster (<http://www.mutationtaster.org>), Mutation Assessor (<http://mutationassessor.org/r3/>), Polyphen-2 (<http://genetics.bwh.harvard.edu/pph2/>), and

Splice AI (<https://spliceailookup.broadinstitute.org>). Sanger sequencing was performed according to standard procedures (Tarailo-Graovac et al., 2016) to confirm the most plausible candidate variants and for parental segregation analysis.

### ***1.3 Copy Number Variations analysis***

For the detection of copy number variations (CNVs), array comparative genomic hybridization (Array-CGH) (Agilent 60K) was performed as previously described in all subjects except patient #1 (Redon et al., 2009). In this individual, CNVs calling was performed using a custom-developed analysis tool (XomeAnalyzer). Data were filtered and analyzed to identify sequence variants and most deletions and duplications involving three or more coding exons, as previously described (Retterer et al., 2015). Potential rearrangements were interpreted according to the Decipher database (<https://decipher.sanger.ac.uk>).

## **2. Supplemental Results**

### ***Supplemental genetic findings in DENND5B patients***

Additional genetic variants were detected in four patients. In subject #1, an interstitial duplication in chromosome 2 was identified: arr[GRCh37] 2p14(64217422\_65650528) x3. This rearrangement was confirmed by FISH and parental FISH testing showed that the mother harbored the same duplication. The duplicated region does not contain any genes associated with autosomal dominant disorders or known pathogenic CNVs. Furthermore, the mother of the patient was completely asymptomatic. Thus this duplication is unlikely to be contributing to his phenotype and can be classified as uncertain significance. In subject #4, the paternally inherited *POLR3A* (NM\_007055.4): c.2350G>A (p.Gly784Ser) variant was identified. This variant is reported in gnomAD with an allele frequency of 0.00000979, being observed in two individuals in heterozygous state, and it is predicted pathogenic according to *in silico* tools (PM2, PP3, and PP5 criteria). Biallelic variants in *POLR3A* (Polymerase III, RNA, subunit a, MIM \* 614258) cause

Leukodystrophy, hypomyelinating, 7, with or without oligodontia and/or hypogonadotropic hypogonadism (MIM # 607694) or Wiedemann-Rautenstrauch syndrome (MIM # 264090). However, the phenotype of this patient is not consistent with these conditions and no additional variants could be detected in *POLR3A*. In subject #5, the maternally inherited *USP9X* (NM\_001039591.3): c.367G>T (p.Gly123Trp) variant was detected. This amino acid change is absent in gnomAD and has conflicting predictions of pathogenicity by *in silico* tools. According to the ACCMG-AMP criteria (BP1, PM2, PP3), this variant is classified as a variant of uncertain significance (VUS). Genetic variants in the *USP9X* gene (Ubiquitin-specific protease 9, X-linked; MIM \* 300072) cause a recessive (Intellectual developmental disorder, X-linked 99, XLID99, MIM # 300919) and a dominant (Intellectual developmental disorder, X-linked 99, syndromic, female-restricted, MRXS99F, MIM # 300968) form of X-linked intellectual disability. However, this patient did not show dysmorphic or neuropsychiatric features suggestive of XLID99.

#### *Identification of additional subjects harboring potentially deleterious DENND5B variants*

While collecting patients through gene matching platforms, we also came across two additional individuals harboring potentially deleterious heterozygous variants in the *DENND5B* gene and presenting with neurodevelopmental phenotypes that partially overlap the clinical manifestations observed in our cohort (Table S4). These two patients (subjects #6 and #7) presented with developmental delay, dysmorphism, and white matter involvement on brain MRI. They harbored the missense variant c.709C>T, p.(Pro237Ser) (subject #6) and the splicing variant c.237+3A>G (subject #7). These variants are rare and predicted to be likely damaging according to *in silico* tools (Table S5). The p.(Pro237Ser) variant detected in subject #6 affects a conserved residue within the DENN (AEX) domain, whereas the c.237+3A>G variant detected in #7 involves a donor site in intron 2 of 20 and might affect splicing (scSNV-ADA = 0.970115). This splicing variant is predicted to disrupt splicing, leading to the formation of either a truncated transcript or a nonsense mediated mRNA decay (NMD).

### *Supplemental genetic findings in the subjects with potentially deleterious DENND5B variants*

In subject #6, ES detected the NC\_012920(MT-TA):m.5590G>A in heteroplasmic status (52%), which was interpreted as a variant of unknown significance. In subject #7, ES led to the identification of the *COL11A1* variants (NM\_001854.3): c.2921C>G, (p.Pro974Arg) and c.4534A>G, (p.Lys1512Glu), of unknown inheritance. Autosomal recessive variants in the *COL11A1* gene (MIM \* 120280) are associated with Fibrochondrogenesis type 1, a complex condition characterized by facial dysmorphism and extensive skeletal defects (Guo et al., 2017). Similar clinical features could not be observed in this patient.

### **3. Supplemental Tables**

**Table S1. *In silico* analysis of *DENND5B* variants.**

**Table S2. Additional variants identified in *DENND5B* patients.**

**Table S3. *In silico* analysis of the two additional potentially deleterious *DENND5B* variants.**

**Table S4. Clinical features of the two additional subjects harboring potentially deleterious *DENND5B* variants.**

**Table S5. Clinical features of *DENND5B* patients.**

**Table S6. Missense variants in *DENND5B* according to gnomAD.**

**Table S7. Missense variation of *DENND5B* domains.**

**Table S8. *In silico* analysis of *DENND5B* polymorphisms reported in the literature.**

#### 4. Supplemental Figures

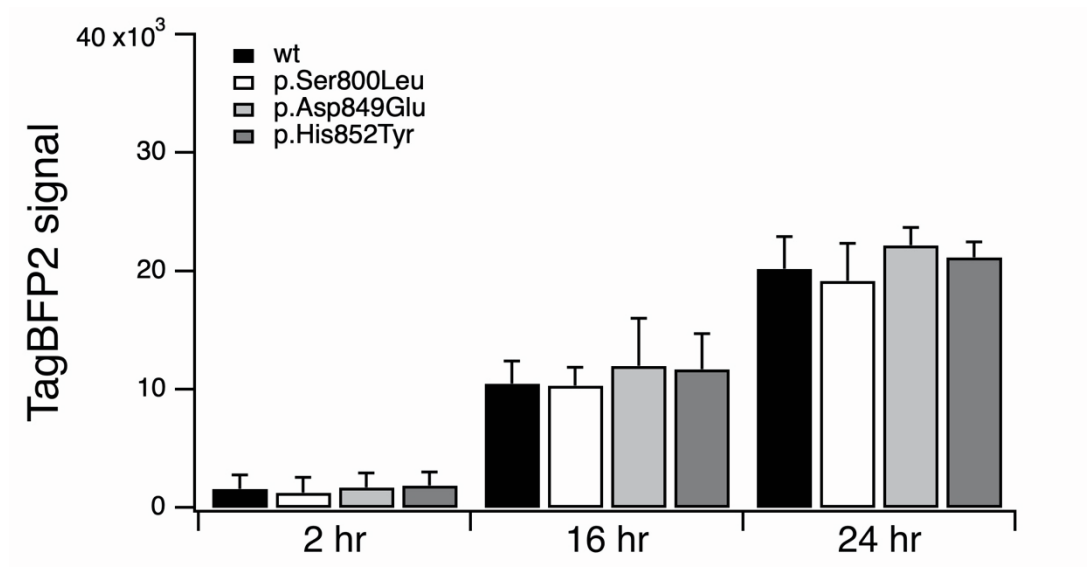

#### Supplemental Figure S1. Analysis of heterologous expression of wild-type and variant

**DENND5B proteins in HeLa cells.** DENND5B proteins were transiently expressed in HeLa cells

by means of vectors encoding the different DENND5B proteins followed by the TagBFP2.

TagBFP2 fluorescence was monitored from 2 hr up to 24 hr after transfection at the indicated timepoints. The observed increase over time of the TagBFP2 signal (that identifies cells transfected with the different DENND5B forms) was comparable, suggesting no significant differences in the transcription of the transgene.

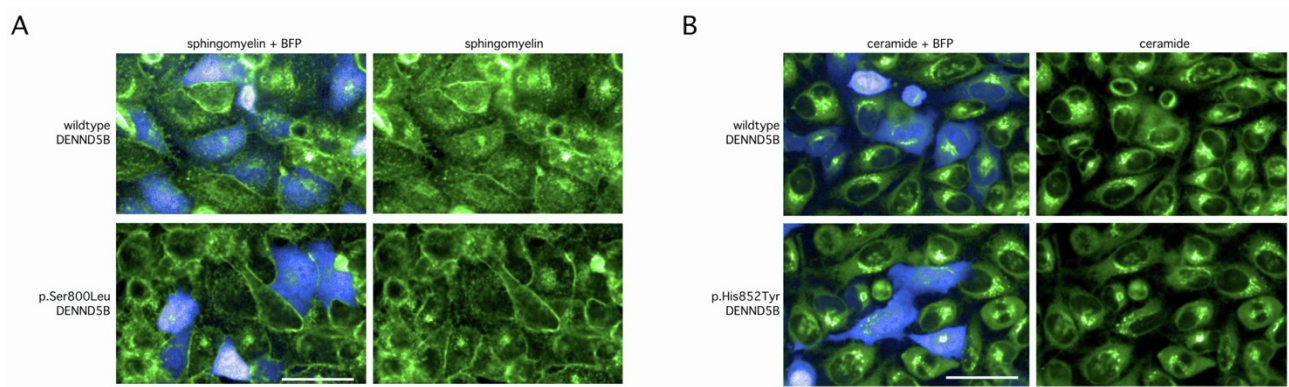

**Supplemental Figure S2. Functional analysis of sphingolipids uptake in HeLa cells expressing wild-type and variant DENND5B proteins.** DENND5B proteins were transiently expressed in HeLa cells by means of vectors encoding the different DENND5B proteins and a TagBFP2-based expression marker that allowed easy monitoring of transfection efficiency. A-B) Confocal microscopy images reported in Figure 3C,D and showing of C12-sphingomyelin (A) or C6-ceramide (B) fluorescent spots alone (green signal, right panels) or merged with the TagBFP2 signal (left panels) that identifies cells transfected with the different DENND5B forms. Scale bar = 100  $\mu\text{m}$ .

## 5. Supplemental References

- Aspromonte MC, Bellini M, Gasparini A, Carraro M, Bettella E, Polli R, Cesca F, Bigoni S, Boni S, Carlet O, Negrin S, Mammi I, Milani D, Peron A, Sartori S, Toldo I, Soli F, Turolla L, Stanzial F, Benedicenti F, Marino-Buslje C, Tosatto SCE, Murgia A, Leonardi E. Characterization of intellectual disability and autism comorbidity through gene panel sequencing. *Hum Mutat.* 2019 Sep;40(9):1346-1363. doi: 10.1002/humu.23822. Epub 2019 Aug 2. Erratum in: *Hum Mutat.* 2020 Jun;41(6):1183.
- Bowling KM, Thompson ML, Amaral MD, Finnila CR, Hiatt SM, Engel KL, Cochran JN, Brothers KB, East KM, Gray DE, Kelley WV, Lamb NE, Lose EJ, Rich CA, Simmons S, Whittle JS, Weaver BT, Nesmith AS, Myers RM, Barsh GS, Bebin EM, Cooper GM. Genomic diagnosis for children with intellectual disability and/or developmental delay. *Genome Med.* 2017 May 30;9(1):43. doi: 10.1186/s13073-017-0433-1.
- DePristo MA, Banks E, Poplin R, et al. A framework for variation discovery and genotyping using next-generation DNA sequencing data. *Nat Genet.* 2011;43:491–8.
- Guillen Sacoto MJ, Tchasovnikarova IA, Torti E, Forster C, Andrew EH, Anselm I, Baranano KW, Briere LC, Cohen JS, Craigen WJ, Cytrynbaum C, Ekhilevitch N, Elrick MJ, Fatemi A, Fraser JL, Gallagher RC, Guerin A, Haynes D, High FA, Inglese CN, Kiss C, Koenig MK, Krier J, Lindstrom K, Marble M, Meddaugh H, Moran ES, Morel CF, Mu W, Muller EA 2nd, Nance J, Natowicz MR, Numis AL, Ostrem B, Pappas J, Stafstrom CE, Streff H, Sweetser DA, Szybowska M; Undiagnosed Diseases Network; Walker MA, Wang W, Weiss K, Weksberg R, Wheeler PG, Yoon G, Kingston RE, Juusola J. De Novo Variants in the ATPase Module of MORC2 Cause a Neurodevelopmental Disorder with Growth Retardation and Variable Craniofacial Dysmorphism. *Am J Hum Genet.* 2020 Aug 6;107(2):352-363. doi: 10.1016/j.ajhg.2020.06.013. Epub 2020 Jul 20. PMID: 32693025; PMCID: PMC7413887.

- Guo L, Elcioglu NH, Wang Z, Demirkol YK, Isguven P, Matsumoto N, Nishimura G, Miyake N, Ikegawa S. Novel and recurrent COL11A1 and COL2A1 mutations in the Marshall-Stickler syndrome spectrum. *Hum Genome Var.* 2017 Oct 5;4:17040. doi: 10.1038/hgv.2017.40. PMID: 28983407; PMCID: PMC5628180.
- Harripaul R, Noor A, Ayub M, Vincent JB. The Use of Next-Generation Sequencing for Research and Diagnostics for Intellectual Disability. *Cold Spring Harb Perspect Med.* 2017 Mar 1;7(3):a026864. doi: 10.1101/cshperspect.a026864. PMID: 28250017; PMCID: PMC5334248.
- McKenna A, Hanna M, Banks E, et al. The Genome Analysis Toolkit: a MapReduce framework for analyzing next-generation DNA sequencing data. *Genome Res.* 2010;20:1297–303.
- Murdock DR, Dai H, Burrage LC, Rosenfeld JA, Ketkar S, Müller MF, Yépez VA, Gagneur J, Liu P, Chen S, Jain M, Zapata G, Bacino CA, Chao HT, Moretti P, Craigen WJ, Hanchard NA; Undiagnosed Diseases Network, Lee B. Transcriptome-directed analysis for Mendelian disease diagnosis overcomes limitations of conventional genomic testing. *J Clin Invest.* 2021 Jan 4;131(1):e141500. doi: 10.1172/JCI141500.
- Redon R, Carter NP. Comparative genomic hybridization: microarray design and data interpretation. *Methods Mol Biol.* 2009;529:37–49.
- Retterer K, Scuffins J, Schmidt D, Lewis R, Pineda-Alvarez D, Stafford A, Schmidt L, Warren S, Gibellini F, Kondakova A, Blair A, Bale S, Matyakhina L, Meck J, Aradhya S, Haverfield E. Assessing copy number from exome sequencing and exome array CGH based on CNV spectrum in a large clinical cohort. *Genet Med.* 2015 Aug;17(8):623-9. doi: 10.1038/gim.2014.160. Epub 2014 Nov 6. PMID: 25356966.
- Tarailo-Graovac M, Shyr C, Ross CJ, Horvath GA, Salvarinova R, Ye XC, Zhang LH, Bhavsar AP, Lee JJ, Drögemöller BI, Abdelsayed M, Alfadhel M, Armstrong L, Baumgartner MR, Burda P, Connolly MB, Cameron J, Demos M, Dewan T, Dionne J, Evans AM, Friedman JM, Garber I, Lewis S, Ling J, Mandal R, Mattman A, McKinnon M, Michoulas A, Metzger D,

Ogunbayo OA, Rakic B, Rozmus J, Ruben P, Sayson B, Santra S, Schultz KR, Selby K, Shekel P, Sirrs S, Skrypnik C, Superti-Furga A, Turvey SE, Van Allen MI, Wishart D, Wu J, Wu J, Zafeiriou D, Kluijtmans L, Wevers RA, Eydoux P, Lehman AM, Vallance H, Stockler-Ipsiroglu S, Sinclair G, Wasserman WW, van Karnebeek CD. Exome Sequencing and the Management of Neurometabolic Disorders. *N Engl J Med*. 2016 Jun 9;374(23):2246-55. doi: 10.1056/NEJMoa1515792.

Wang K, Li M, Hakonarson H. ANNOVAR: functional annotation of genetic variants from high-throughput sequencing data. *Nucleic Acids Res*. 2010;38:e164.

## **6. Supplemental information**

### ***Members of the Undiagnosed Diseases Network***

Maria T. Acosta, David R. Adams, Raquel L. Alvarez, Justin Alvey, Aimee Allworth, Ashley Andrews, Euan A. Ashley, Ben Afzali, Carlos A. Bacino, Guney Bademci, Ashok Balasubramanyam, Dustin Baldridge, Jim Bale, Michael Bamshad, Deborah Barbouth, Pinar Bayrak-Toydemir, Anita Beck, Alan H. Beggs, Edward Behrens, Gill Bejerano, Hugo J. Bellen, Jimmy Bennett, Jonathan A. Bernstein, Gerard T. Berry, Anna Bican, Stephanie Bivona, Elizabeth Blue, John Bohnsack, Devon Bonner, Lorenzo Botto, Lauren C. Briere, Gabrielle Brown, Elizabeth A. Burke, Lindsay C. Burrage, Manish J. Butte, Peter Byers, William E. Byrd, John Carey, Olveen Carrasquillo, Thomas Cassini, Ta Chen Peter Chang, Sirisak Chanprasert, Hsiao-Tuan Chao, Ivan Chinn, Gary D. Clark, Terra R. Coakley, Laurel A. Cobban, Joy D. Cogan, Matthew Coggins, F. Sessions Cole, Heather A. Colley, Heidi Cope, Rosario Corona, William J. Craigen, Andrew B. Crouse, Michael Cunningham, Precilla D'Souza, Hongzheng Dai, Surendra Dasari, Joie Davis, Jyoti G. Dayal, Margaret Delgado, Esteban C. Dell'Angelica, Katrina Dipple, Daniel Doherty, Naghmeh Dorrani, Argenia L. Doss, Emilie D. Douine, Dawn Earl, David J. Eckstein, Lisa T. Emrick, Christine M. Eng, Marni Falk, Elizabeth L. Fieg, Paul G. Fisher, Brent

L. Fogel, Irman Forghani, Jiayu Fu, William A. Gahl, Ian Glass, Page C. Goddard, Rena A. Godfrey, Alana Grajewski, Andrea Gropman, Meghan C. Halley, Rizwan Hamid, Neal Hanchard, Kelly Hassey, Nichole Hayes, Frances High, Anne Hing, Fuki M. Hisama, Ingrid A. Holm, Jason Hom, Martha Horike-Pyne, Alden Huang, Yan Huang, Sarah Hutchison, Wendy Introne, Rosario Isasi, Kosuke Izumi, Gail P. Jarvik, Jeffrey Jarvik, Suman Jayadev, Orpa Jean-Marie, Vaidehi Jobanputra, Emerald Kaitryn, Shamika Ketkar, Dana Kiley, Gonench Kilich, Shilpa N. Kobren, Isaac S. Kohane, Jennefer N. Kohler, Susan Korrick, Deborah Krakow, Donna M. Krasnewich, Elijah Kravets, Seema R. Lalani, Byron Lam, Christina Lam, Brendan C. Lanpher, Ian R. Lanza, Kimberly LeBlanc, Brendan H. Lee, Roy Levitt, Richard A. Lewis, Pengfei Liu, Xue Zhong Liu, Nicola Longo, Sandra K. Loo, Joseph Loscalzo, Richard L. Maas, Ellen F. Macnamara, Calum A. MacRae, Valerie V. Maduro, AudreyStephannie Maghiro, Rachel Mahoney, May Christine V. Malicdan, Laura A. Mamounas, Teri A. Manolio, Rong Mao, Ronit Marom, Gabor Marth, Beth A. Martin, Martin G. Martin, Julian A. Martínez-Agosto, Shruti Marwaha, Jacob McCauley, Allyn McConkie-Rosell, Alexa T. McCray, Elisabeth McGee, Matthew Might, Danny Miller, Ghayda Mirzaa, Eva Morava, Paolo Moretti, Marie Morimoto, John J. Mulvihill, Mariko Nakano-Okuno, Stanley F. Nelson, Shirley Nieves-Rodriguez, Donna Novacic, Devin Oglesbee, James P. Orengo, Laura Pace, Stephen Pak, J. Carl Pallais, Jeanette C. Papp, Neil H. Parker, Leoyklang Petcharet, John A. Phillips III, Jennifer E. Posey, Lorraine Potocki, Barbara N. Pusey Swerdzewski, Aaron Quinlan, Deepak A. Rao, Anna Raper, Wendy Raskind, Genecee Renteria, Chloe M. Reuter, Lynette Rives, Amy K. Robertson, Lance H. Rodan, Jill A. Rosenfeld, Elizabeth Rosenthal, Francis Rossignol, Maura Ruzhnikov, Marla Sabaii, Ralph Sacco, Jacinda B. Sampson, Mario Saporta, Judy Schaechter, Timothy Schedl, Kelly Schoch, Daryl A. Scott, Elaine Seto, Prashant Sharma, Vandana Shashi, Emily Shelkowitz, Sam Sheppeard, Jimann Shin, Edwin K. Silverman, Janet S. Sinsheimer, Kathy Sisco, Edward C. Smith, Kevin S. Smith, Lilianna Solnica-Krezel, Ben Solomon, Rebecca C. Spillmann, Andrew Stergachis, Joan M. Stoler, Kathleen Sullivan, Jennifer A. Sullivan, Shirley Sutton, David A.

Sweetser, Virginia Sybert, Holly K. Tabor, Queenie K.-G. Tan, Amelia L. M. Tan, Arjun Tarakad, Herman Taylor, Mustafa Tekin, Fred Telischi, Willa Thorson, Cynthia J. Tifft, Camilo Toro, Alyssa A. Tran, Rachel A. Ungar, Tiina K. Urv, Adeline Vanderver, Matt Velinder, Dave Viskochil, Tiphane P. Vogel, Colleen E. Wahl, Melissa Walker, Nicole M. Walley, Jennifer Wambach, Jijun Wan, Lee-kai Wang, Michael F. Wangler, Patricia A. Ward, Daniel Wegner, Monika Weisz Hubshman, Mark Wener, Tara Wenger, Monte Westerfield, Matthew T. Wheeler, Jordan Whitlock, Lynne A. Wolfe, Kim Worley, Shinya Yamamoto, Zhe Zhang, Stephan Zuchner
